# Supplementary material for: Naked Mole Rat Induced Pluripotent Stem Cells and Their Contribution to Interspecific Chimera
Source: PubMed Central journal article supplement — Stem Cell Reports. 2017 Oct 26;9(5):1706–20. doi: 10.1016/j.stemcr.2017.09.013 (PMC5829328; doi:10.1016/j.stemcr.2017.09.013), 2017-10-26
Supplement: mmc2.pdf [file mmc2.pdf]

# Naked Mole Rat Induced Pluripotent Stem Cells and Their Contribution to Interspecific Chimera

Sang-Goo Lee,<sup>1,7</sup> Aleksei E. Mikhilchenko,<sup>1,2,7</sup> Sun Hee Yim,<sup>1</sup> Alexei V. Lobanov,<sup>1</sup> Jin-Kyu Park,<sup>3</sup> Kwang-Hwan Choi,<sup>3</sup> Roderick T. Bronson,<sup>4</sup> Chang-Kyu Lee,<sup>3,5</sup> Thomas J. Park,<sup>6</sup> and Vadim N. Gladyshev<sup>1,\*</sup>

<sup>1</sup>Division of Genetics, Department of Medicine, Brigham and Women's Hospital, Harvard Medical School, Boston, MA 02115, USA

<sup>2</sup>Center for Data-Intensive Biomedicine and Biotechnology, Skolkovo Institute of Science and Technology, Moscow 143028, Russia

<sup>3</sup>Department of Agricultural Biotechnology, and Research Institute of Agriculture and Life Science, Seoul National University, Seoul 151-921, Korea

<sup>4</sup>Rodent Histopathology Laboratory, Harvard Medical School, Boston MA 02115, USA

<sup>5</sup>Institute of Green Bio Science and Technology, Seoul National University, Pyeongchang, Gangwon-do 232-916, Korea

<sup>6</sup>Department of Biological Sciences, University of Illinois at Chicago, Chicago, IL 60607, USA

<sup>7</sup>Co-first author

\*Correspondence: [vgladyshev@rics.bwh.harvard.edu](mailto:vgladyshev@rics.bwh.harvard.edu)

<https://doi.org/10.1016/j.stemcr.2017.09.013>

## SUMMARY

Naked mole rats (NMRs) are exceptionally long-lived, cancer-resistant rodents. Identifying the defining characteristics of these traits may shed light on aging and cancer mechanisms. Here, we report the generation of induced pluripotent stem cells (iPSCs) from NMR fibroblasts and their contribution to mouse-NMR chimeric embryos. Efficient reprogramming could be observed under N2B27+2i conditions. The iPSCs displayed a characteristic morphology, expressed pluripotent markers, formed embryoid bodies, and showed typical differentiation patterns. Interestingly, NMR embryonic fibroblasts and the derived iPSCs had propensity for a tetraploid karyotype and were resistant to forming teratomas, but within mouse blastocysts they contributed to both interspecific placenta and fetus. Gene expression patterns of NMR iPSCs were more similar to those of human than mouse iPSCs. Overall, we uncovered unique features of NMR iPSCs and report a mouse-NMR chimeric model. The iPSCs and associated cell culture systems can be used for a variety of biological and biomedical applications.

## INTRODUCTION

The naked mole rat (NMR; *Heterocephalus glaber*) (Figure 1A, top) is an emerging model organism for studies on aging and cancer. While NMRs and mice have a similar body size, the former live 10 times longer than the latter (~30 versus ~3 years) (Edrey et al., 2011). NMRs are also highly resistant to both spontaneous and experimentally induced cancer (Liang et al., 2010; Seluanov et al., 2009). Moreover, NMRs exhibit the absence of pain sensitization due to hypofunctional *TrkA* receptor (Omerbasic et al., 2016) and extreme resistance to hypoxia through fructose metabolism to avoid tissue damage (Park et al., 2017). In addition, these animals do not maintain stable body temperature, can live at low oxygen and high carbon dioxide concentrations in the atmosphere, and show other features that are useful for biomedical research (Edrey et al., 2011; Kim et al., 2011).

Until now, tissue samples have been the main source for comparative studies involving NMRs. However, phenotypes of these animals have been difficult to assess, mainly due to the limited access to embryonic material and cell culture models. Live cell models are preferred over tissue samples in assessing and manipulating the unique features of these animals. Pluripotent stem cells could be an important biological resource for such studies. Embryonic stem cells (ESCs) exhibit pluripotency and can form any cell

type (Evans and Kaufman, 1981; Martin, 1981; Brook and Gardner, 1997). However, NMRs are eusocial rodents that live in large colonies with only one breeding female. Such reproductive behavior is a major limitation for generating ESCs from blastocysts.

Induced pluripotent stem cells (iPSCs) have similar biological characteristics to ESCs, including morphology, capacity for infinite proliferation, gene expression profiles, the ability to form the derivatives of all three germ layers, and the utility for germline transmission (Takahashi and Yamanaka, 2006; Chin et al., 2009). iPSCs also offer several advantages over ESCs because they can be generated without using embryos, e.g., by manipulating adult cells. The first iPSCs were generated 11 years ago using four pluripotency factors, OCT4, SOX2, KLF4, and c-MYC (OSKM), reprogramming mouse fibroblasts (Takahashi and Yamanaka, 2006). Since then, iPSCs were generated from several mammals, including humans (Takahashi et al., 2007; Yu et al., 2007), rats (Liao et al., 2009), pigs (Esteban et al., 2009; Ezashi et al., 2009), cows (Huang et al., 2011), dogs (Luo et al., 2011), rabbits (Honda et al., 2010), horses (Nagy et al., 2011), buffalos (Deng et al., 2012), sheep (Bao et al., 2011), and bats (Mo et al., 2014). In many studies, iPSCs have served as a substitute for ESCs and a source of somatic cells. The successful generation of NMR iPSCs could bring a much-needed resource for characterizing relevant phenotypes.

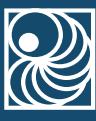

**A** Naked mole rat (*Heterocephalus glaber*)

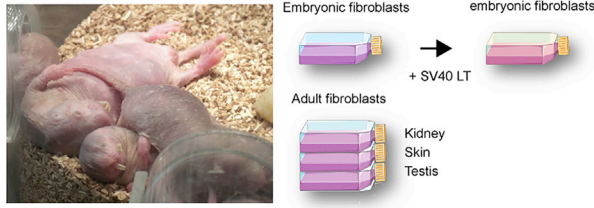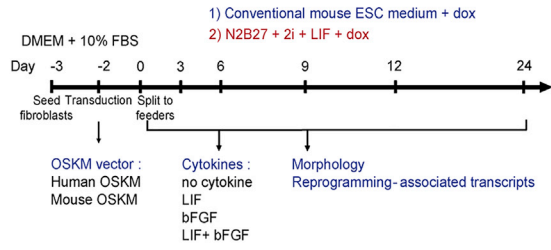

**B**

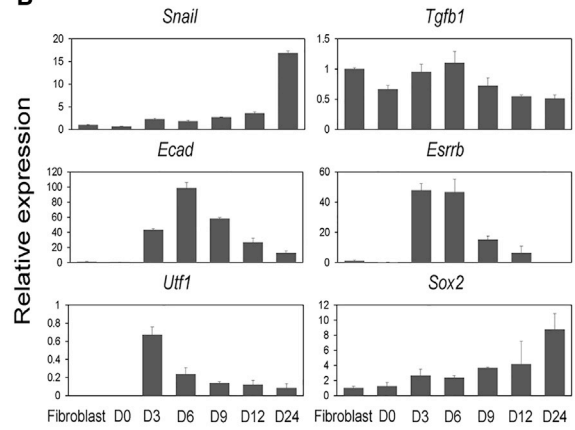

**C**

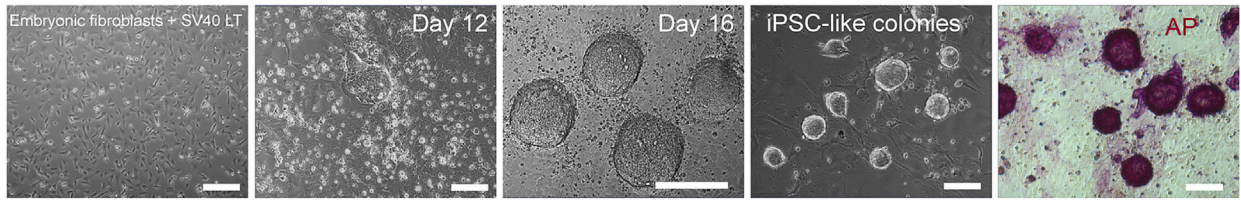

**D**

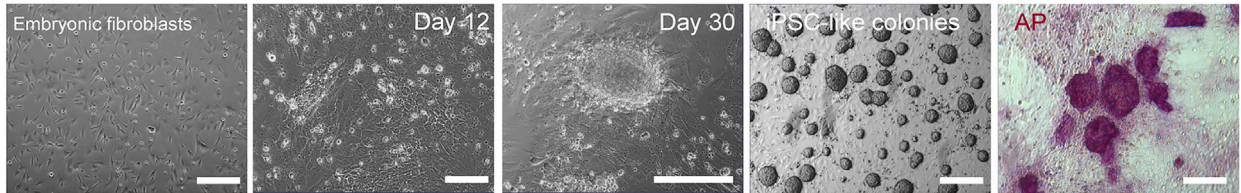

**E**

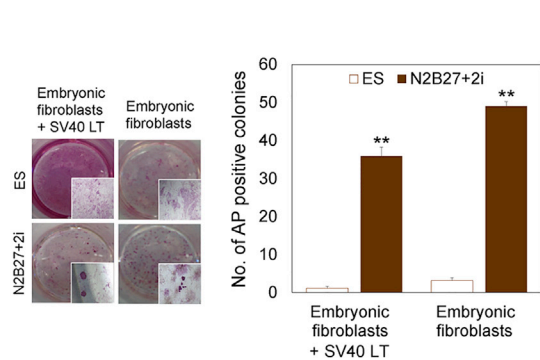

**F**

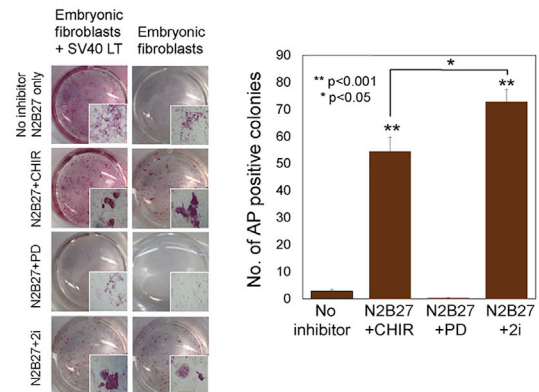

**G**

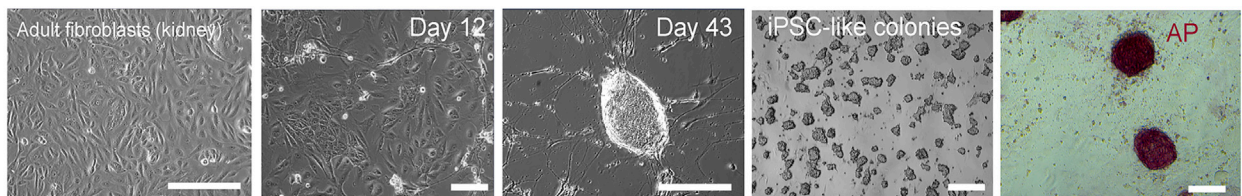

(legend on next page)

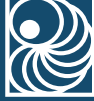

Recently, Miyawaki et al. (2016) reported the generation of NMR iPSCs, found resistance to teratoma formation and attributed this feature to elevated *Arf* expression and mutation in the *Eras* oncogene. They used a conventional human culture condition to derive NMR iPSCs and found that they could be generated at high oxygen and with a low efficiency of reprogramming in the case of adult fibroblasts. Moreover, chimeric contribution of NMR iPSCs has not been examined that would further support their pluripotency.

Here, we report the development of NMR iPSCs from embryonic and adult fibroblasts using drug-inducible expression of OSKM with high efficiency. The iPSCs displayed the pluripotency and some non-canonical features such as a propensity for a tetraploid karyotype and resistance to forming teratomas. Interestingly, these iPSCs contributed to interspecific chimera despite differences in physiological temperature and phylogenetic distance. Moreover, the transcriptomes of NMR iPSCs were more similar to those of human than mouse iPSCs. These cells and the associated protocols should pave the way for generation of gene-targeted NMR models for biomedical research and provide much-needed cell culture systems to facilitate aging and cancer-related research at the cellular and molecular levels.

## RESULTS

### Conventional Protocols that Support Preparation of Mouse iPSCs Do Not Favor NMR Cell Reprogramming

To reprogram NMR cells, we employed a doxycycline-inducible lentiviral system, in which mouse or human OSKM were inserted downstream of a tetracycline operator (Carey et al., 2009; Hockemeyer et al., 2008). We first used NMR embryonic fibroblasts (~45 days postcoitum)

(Figure 1A, top) and maintained them in a conventional mouse ESC medium following transduction (Figure 1A, bottom, blue letters). Reprogramming of somatic cells toward iPSCs is thought to proceed through three phases: initiation, maturation, and stabilization (Plath and Lowry, 2011). The initiation phase is marked by the mesenchymal-to-epithelial transition (MET) and bone morphogenic protein signaling (Li et al., 2010; Samavarchi-Tehrani et al., 2010), and E-cadherin impeding reprogramming (Chen et al., 2010). *Esrrb* and *Utf1* represent early markers that predict an eventual reprogramming event, whereas endogenous *Sox2* is a late-phase reprogramming factor (Buganim et al., 2012).

To gain insights into MET and NMR cell reprogramming, we quantified NMR-specific E-cadherin (*Ecad*), *Esrrb*, *Utf1*, and *Sox2* transcripts on day 6 following transduction (Figure 1A; bottom). Mouse OSKM-transduced NMR cells showed higher expression of these transcripts compared with cells transduced with human OSKM, although both approaches induced expression of the marker genes. In particular, the *Ecad* levels were 30-fold higher than in control fibroblasts (Figure S1A). We further found that cytokine treatment increased the expression of reprogramming-related genes, with LIF (leukemia inhibitory factor) being a stronger inducer than basic fibroblast growth factor (Figure S1B). Hence, mOSKM and LIF were chosen for further experiments. We screened for changes in marker gene expression until day 24 and also analyzed the initial reprogramming genes *Snail* and *Tgfb1* (Figure 1B). *Snail* expression increased starting from day 3 and was maximal at day 24. *Tgfb1* increased at day 6 and gradually decreased until day 24. *Ecad*, *Esrrb*, and *Utf1* were dramatically increased from days 3–6 and gradually decreased to day 24. *Sox2* was gradually increased to day 24. Thus, transcription factors and cytokines could alter reprogramming-associated gene expression in NMRs. With the same method, we generated mouse iPSCs from embryonic and adult

### Figure 1. Generation of Naked Mole Rat iPSCs

(A) Naked mole rat (*Heterocephalus glaber*) and fibroblasts used in this study (top). Schematic diagram of the conventional (blue) and NMR (red) reprogramming protocols (bottom).

(B) Real-time PCR analyses of reprogramming-associated gene expression up to day 24 (e.g., D1, day 1; D3, day 3, etc.). All values are mean  $\pm$  SEM from three independent experiments. Relative expression was normalized to the expression of *Gapdh*.

(C) Generation of NMR iPSCs from embryonic fibroblasts transfected with SV40 LT. Immortalized cells, cells at day 12 after transduction, and cells at day 16 after transduction, showing iPSC-like morphology and AP staining.

(D) Generation of NMR iPSCs from embryonic fibroblasts. Embryonic fibroblasts, cells at day 12 after transduction, and cells at day 30 after transduction, showing iPSC-like morphology and AP staining.

(E) AP-positive colonies derived from NMR embryonic fibroblasts maintained in ESC and N2B27 media (upper panel). Quantification is in the lower panel. Values represent means  $\pm$  SD for three independent experiments. \*\**p* < 0.001.

(F) AP-positive colonies derived from NMR embryonic fibroblasts maintained in the indicated medium in combination with inhibitors (left panel). Quantification is in the right panel. Values represent means  $\pm$  SD for three independent experiments. \**p* < 0.05, \*\**p* < 0.001.

(G) Generation of NMR iPSCs from adult fibroblasts. Adult fibroblasts, cells at day 12 after transduction, and cells at day 43 after transduction, showing iPSC-like morphology and AP staining.

Scale bars, 100  $\mu$ m. See also Figures S1 and S2.



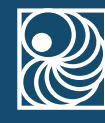

fibroblasts (Figures S1C and S1D). However, NMR cells showed no visible morphological changes until day 24 (Figure S1E), when we detected OCT4-expressed cells (Figure S1F). Nevertheless, this approach did not result in viable ESC-like NMR colonies, suggesting that the conventional protocols, which readily support preparation of mouse iPSCs, are unsatisfactory for deriving NMR iPSCs.

### Development of Optimal Protocols to Support Generation of NMR iPSCs

SV40 large T antigen has been reported to improve the efficiency of iPSC generation (Park et al., 2008). Reducing p53 expression can also improve this process (Mali et al., 2008; Utikal et al., 2009; Hong et al., 2009; Hanna et al., 2009a). In fact, SV40 large T antigen may support iPSC generation by inhibiting p53 expression (Bao et al., 2011). Also, unlike mouse cells, rat ESCs and iPSCs require specific culture conditions, such as serum-free defined culture medium (N2B27) with inhibition of the MEK (mitogen-activated protein kinase)/ERK (extracellular signal regulated kinases 1 and 2) pathway and glycogen synthase kinase 3 (GSK3) by small synthetic drugs PD0325901 (PD) and CHIR99021 (CHIR), respectively. These culture conditions (N2B27+2i) were also beneficial for establishing and maintaining ground state pluripotent cells from other species, including mouse and human (Ying et al., 2008; Hanna et al., 2009b; Buehr et al., 2008).

We applied the N2B27+2i culture model to NMR embryonic fibroblasts and immortalized embryonic fibroblasts by inserted SV40 large T antigen in combination with the lentiviral system (Figure 1A, bottom). Remarkably, 16 days after transduction, typical ESC colony-like cells were observed in immortalized embryonic fibroblasts (Figure 1C). These colonies showed strong alkaline phosphatase (AP) activity, suggesting pluripotency (Figure 1C). Interestingly, in the case of normal embryonic fibroblasts, the first colonies were visible at day 30 (Figure 1D). NMR iPSCs could be routinely passaged on feeder systems every 5 days. These colonies exhibited round, tightly packed morphology characterized by a high ratio of nucleus to cytoplasm and prominent nucleoli (Figures 1C and 1D), similar to rat iPSCs. To optimize the protocol, we cultured OSKM-transduced cells in various culture conditions and performed AP staining. These analyses confirmed the difference between conventional ESC and N2B27+2i media (Figure 1E). Clearly, N2B27+2i media dramatically induced AP-positive colonies with typical ESC-like morphology, suggesting that this culture condition is particularly effective for reprogramming NMR cells.

We next examined the effect of inhibitors on AP-positive colony formation using N2B27+ LIF with or without PD or CHIR. The number of AP-positive colonies in the presence of CHIR and 2i was much higher than under other condi-

tions, supporting a role of CHIR in reprogramming (Figure 1F). We also examined the effect of cytokines, with LIF representing the most effective factor (Figure S2A). On the other hand, the reprogramming efficiency was influenced by neither feeder/feeder-free monolayer culture (Figure S2B) nor ascorbic acid (Figure S2C). After serial passaging of ESC-like colonies, extensive spontaneous differentiation was observed. An inhibitor of type 1 transforming growth factor  $\beta$  receptor ALK5 (A83-01) can help maintain rat iPSCs (Li et al., 2009), and we found that it supported homogeneous population and prevented spontaneous differentiation of NMR iPSCs (Figure S2D). We also observed that the expression of SV40 large T accelerated reprogramming of NMR iPSCs, e.g., the reprogramming time was reduced in immortalized fibroblasts compared with normal fibroblasts (16 and 30 days, respectively).

We further applied these culture conditions to reprogram adult somatic fibroblasts isolated from the kidney of a 1-year-old male NMR. In this case, the first colony was visible on day 43, suggesting that the reprogramming period was extended compared with embryonic fibroblasts (Figure 1G). The reprogramming efficiency was  $0.17\% \pm 0.01\%$  for immortalized embryonic fibroblasts,  $0.24\% \pm 0.01\%$  for normal embryonic fibroblasts (embryonic), and  $0.085\% \pm 0.0132\%$  for adult somatic fibroblasts. We also succeeded in generating iPSCs from adult skin and testis cells (Figure S2E), suggesting that the procedure we developed represents a robust protocol for derivation of stable NMR iPSCs. Real-time PCR analysis using primers specific for OSKM transgenes showed no expression of exogenous *Oct4* and *c-Myc* after removal of doxycycline from culture medium (Figure S2F). Taken together, we established effective conditions for cell reprogramming and for maintaining NMR iPSCs.

### Pluripotent Characteristics of NMR iPSCs

The generated NMR iPSCs could be stably passaged for more than 30 generations. They exhibited pluripotent cell markers, including OCT4, SOX2, and SSEA1 (Figure 2A). RT-PCR analysis revealed upregulation of several endogenous pluripotent genes (*Sox2*, *Nanog*, *Fgf4*, *Utf1*, *Zfp42*, and *Tert*) in NMR iPSCs (Figure 2B). To test for differentiation of NMR iPSCs *in vitro*, we allowed them to form embryonic bodies (EBs) and undergo differentiation for 7 days, and then analyzed for the presence of markers characterizing each germ layer. NMR iPSCs were able to differentiate into all three germ layers, as demonstrated by high expression of *Sox17* (endoderm), *Gata4* (endoderm), *Pdx1* (endoderm), *Acta2* (mesoderm), *Actc1* (mesoderm), *Kdr* (ectoderm), *Sox1* (ectoderm), *Pax6* (ectoderm), and *Nes* (Nestin; ectoderm) (Figure 2C). We further examined *in vitro* differentiation of NMR iPSCs by immunocytochemistry. NMR EBs were transferred onto

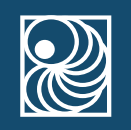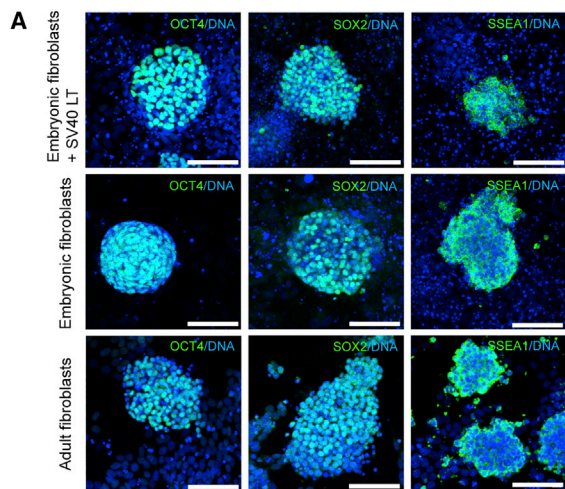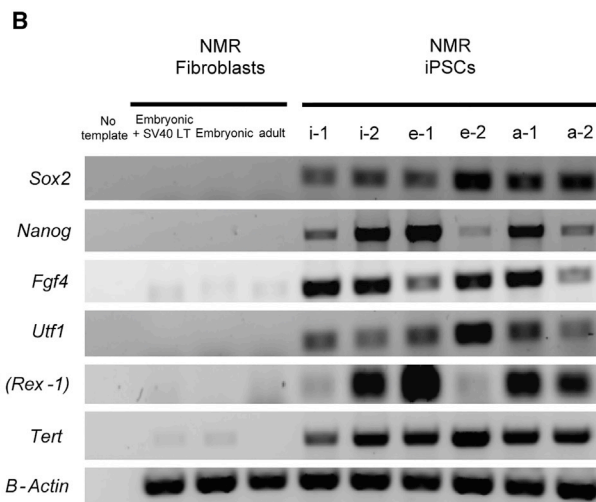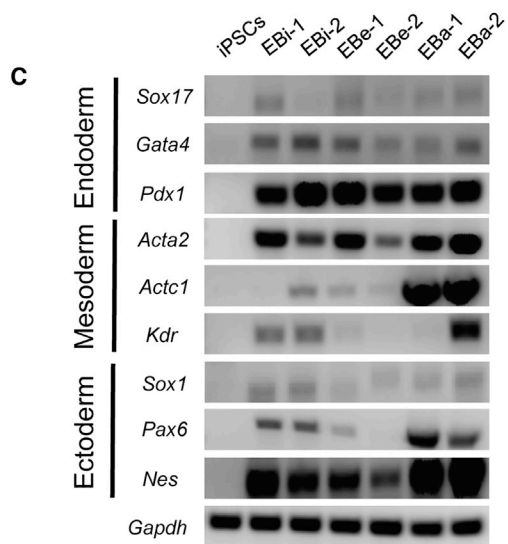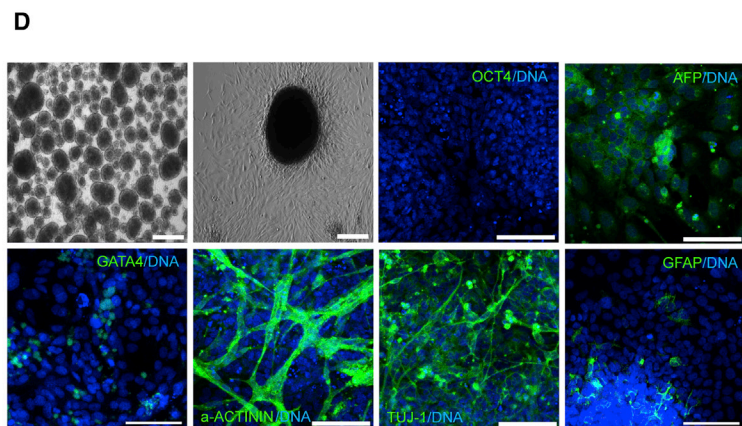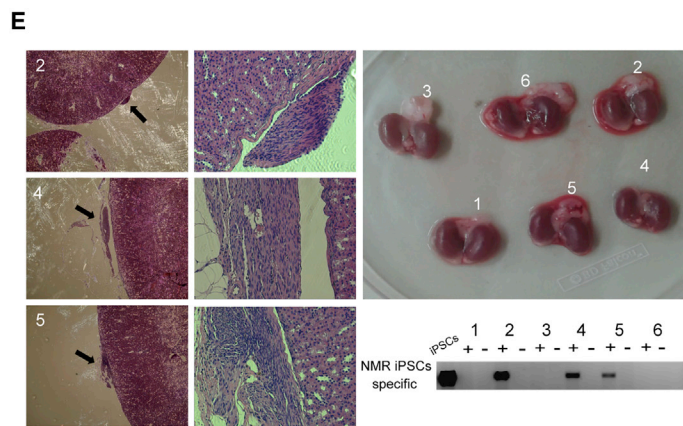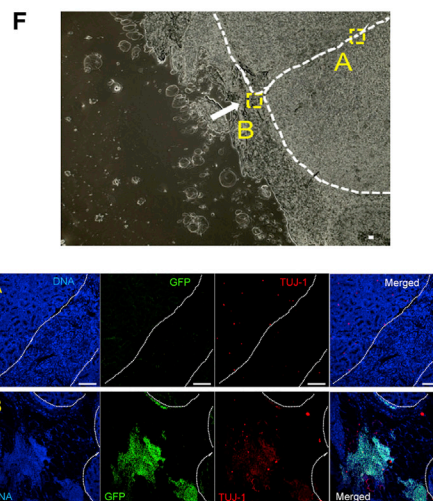

(legend on next page)

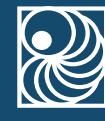

gelatin-coated plates for continued cultivation, and the attached cells exhibited different morphologies. Immunocytochemistry analyses detected cells positive for alpha-fetoprotein (endoderm), GATA4 (endoderm), alpha-actinin (a-ACTININ; mesoderm),  $\beta$ III-tubulin (TUJ-1; ectoderm), and glial fibrillary acidic protein (ectoderm) (Figure 2D).

NMRs exhibit an unusual mode of thermoregulation in that they are endothermic and capable of employing non-shivering thermogenesis (Buffenstein and Yahav, 1991). NMR fibroblasts grow poorly at the standard 37°C conditions, perhaps because the animals have a body temperature several degrees lower in their natural environment (Lewis et al., 2012). Prior to teratoma assays and chimera production, we examined the effect of high temperature on maintenance of NMR iPSCs and the process of differentiation *in vitro*. The number of viable NMR iPSCs significantly decreased at 37°C after culturing them for 10 or 20 days (Figure S3A). When we cultured NMR iPSCs in a normal fibroblast medium without pluripotent environment (LIF and 2i), the number of viable cells decreased at day 30, but no significant differences were observed in comparison with the 32°C environment (Figure S3B). We also compared the formation of EBs between 32°C and 37°C, but there was no difference in morphology (Figure S3C) and the number of EBs (Figure S3D). These EBs were differentiated to three germ layers as revealed by immunocytochemistry (Figure S3E). Together, we found that elevated temperature (37°C) led to a reduced number of NMR iPSCs and their derivatives during differentiation *in vitro*. Nevertheless, some surviving cells could differentiate into all three germ layers even at elevated temperature.

To determine whether NMR iPSCs displayed *in vivo* pluripotency, six lines of NMR iPSCs were injected into renal capsules of six severe combined immunodeficiency

(SCID) mice. No teratomas were detected 12 weeks following injection. However, nerves were found on the cortex in half of the injected kidneys, as revealed by histological examination and NMR-specific sequences (Figure 2E, left panel). We also used EGFP-expressed iPSCs (Figure S4A) for teratoma assay and found that these cells were positive for a neuronal marker (TUJ-1) by immunocytochemistry (Figure 2F). Thus, these nerve cells were derived from the NMR iPSCs rather than from mouse cells, and this happened without tumor formation.

### Propensity for a Tetraploid Karyotype in NMR Fibroblasts and iPSCs

Karyotype abnormality is often associated with quality of iPSCs. We karyotyped 12 NMR iPSCs lines, which were derived from three different fibroblast lines, at passage 10. Except for one line (2N = 60 chromosomes) derived from immortalized fibroblasts, NMR iPSCs lines showed a sign of tetraploidy (2N = 120 chromosomes) (Figure 3A). We also karyotyped the seven fibroblast lines that were used for generation of NMR iPSCs. Interestingly, embryonic fibroblasts also showed the tetraploid karyotype, while adult fibroblasts exhibited primarily normal karyotype (Figures 3A and 3B). To clarify these characteristics of NMR cells, we performed DNA content analysis in fibroblasts and their respective iPSCs by fluorescence-activated cell sorting. Embryonic fibroblasts exhibited diploid (2N), tetraploid (4N), and mixed diploid/tetraploid DNA, while adult fibroblasts were primarily diploid (2N) (Figure 3C). These findings support the idea that NMRs may rely on the increased use of tetraploid cells. We noted that iPSCs derived from embryonic fibroblasts did not change DNA content, whereas iPSCs from adult fibroblasts increased their tetraploidy (4N). The DNA content of each iPSC line did not change during differentiation (Figure 3D). We

### Figure 2. Characterization of NMR iPSCs

(A) Representative images of NMR iPSC colonies from cells of indicated origin following immunostaining for OCT4, SOX2, and SSEA-1. Scale bars, 100  $\mu$ m.

(B) RT-PCR analysis of endogenous pluripotent genes expressed in NMR iPSCs. (i) iPSCs from immortalized fibroblasts; (e) iPSCs from embryonic fibroblasts; (a) iPSCs from adult fibroblasts; origin, two independently established clones.

(C) RT-PCR analysis of genes expressed in EBs derived from NMR iPSCs (Immortalized; EBi, embryonic; EBe, adult; EBa origin: two independently established NMR iPSC lines; iPSCs: undifferentiated iPSC line).

(D) *In vitro* differentiation of NMR iPSCs. EB formation. Immunocytochemical analyses of EB expression: pluripotency marker (OCT4; negative control), endoderm (alpha-fetoprotein [AFP] and GATA4), mesoderm (a-ACTININ), and ectoderm (TUJ-1 and glial fibrillary acidic protein [GFAP]) markers. Scale bars, 100  $\mu$ m.

(E) Teratoma assay involving NMR iPSCs. Sections of kidney capsules of mice transplanted with NMR iPSCs (five tetraploid and one diploid iPSC; no. 2 kidney was injected with the diploid iPSCs) after 10 weeks (left panel; upper right). Some nerve-like cells were observed on the cortex (left panels, shown by arrows; magnified in the middle panels). H&E staining is also shown. Numbers represent individual kidney samples. Genomic PCR analyses show that the nerve-like cells were of the NMR origin (lower right panel). +, injected kidney capsule; -, non-injected kidney capsule in this panel.

(F) Teratoma assay involving EGFP-expressed NMR iPSCs. The white dashed line shows the border between the kidney capsule and the site of the injection scar. The arrow indicates the injection site of NMR iPSCs into kidney capsules. A, regions of inner cortex; B, regions of injection site on the cortex. Immunocytochemical analyses of EGFP cell expression: neuronal marker (TUJ-1). Scale bars, 100  $\mu$ m.



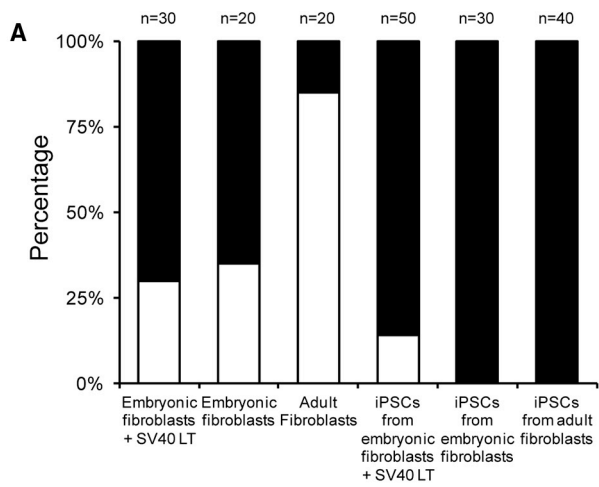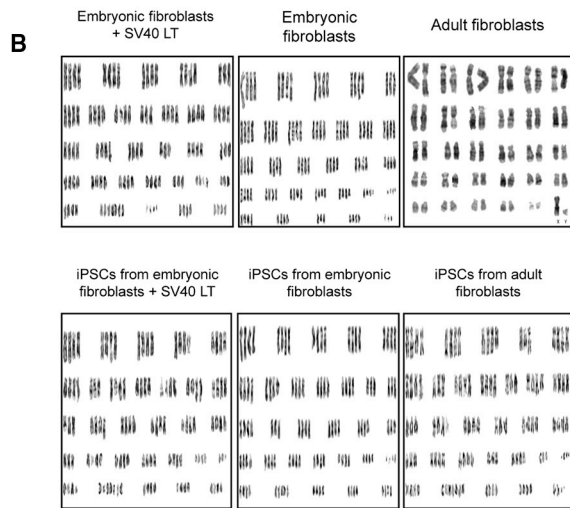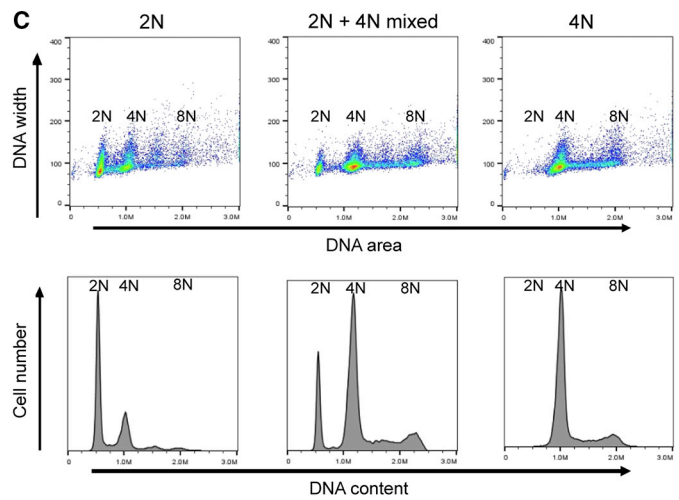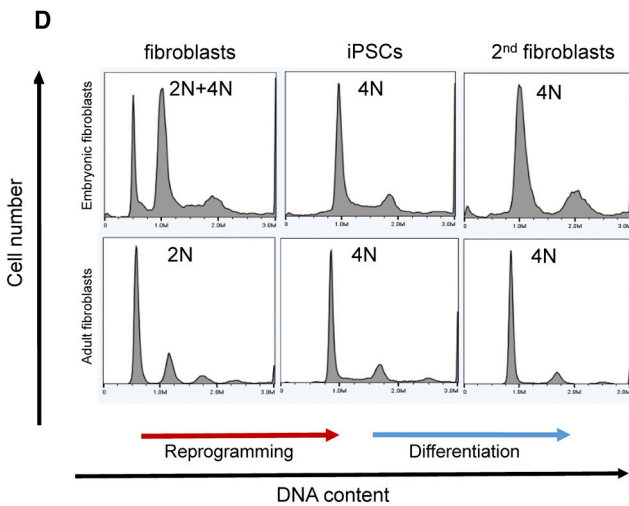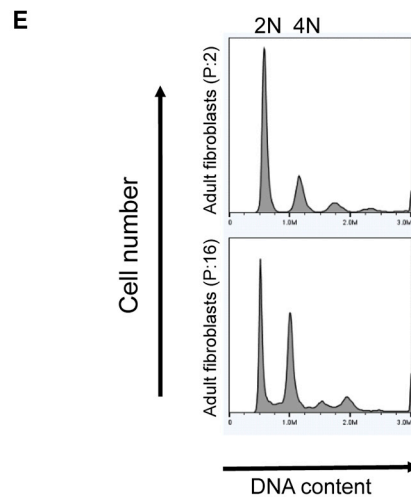

(legend on next page)

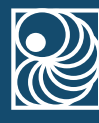

also found that 4N cells increased during long-term culture of fibroblasts (Figure 3E). We did not observe differences between NMR tetraploid and diploid iPSCs when they were grown at 32°C and 37°C (Figures S3A and S3B) or subjected to the teratoma assay (Figure 2E, left panel). Overall, NMR embryonic fibroblasts and iPSCs showed a high propensity for the tetraploid karyotype.

### Contribution to Chimera Embryogenesis

To test for the ability of NMR iPSCs to generate interspecies chimera *in vivo*, we prepared NMR iPSCs that expressed EGFP (Figure S4A) and exhibited pluripotent cell makers (Figure S4B). These cells were microinjected into embryonic day 3.5 (E3.5) blastocysts of C57BL/6 mice and allowed to develop to the E13.5 (Figure S4C). After dissection, a total 28 embryos were obtained from two surrogate mothers, with an equal number of normal and aborted embryos (Figure 4A; upper). To confirm the interspecies chimerism of NMR iPSCs, genomic DNA extracted from normal and aborted embryos was PCR-amplified using NMR iPSCs-specific primers (Figure S4D). About a quarter of normal embryos from two surrogate mothers were confirmed to be interspecific chimera by genomic PCR (Figure 4A, bottom). Compared with previous data in rat-mouse interspecific chimera production (Kobayashi et al., 2010), the percentage of NMR iPSCs chimerism in mouse fetus was similar, even though there are species-specific developmental patterns of NMRs, rats and mice. Whole-mount immunostaining with anti-GFP antibodies revealed the presence of NMR iPSC-derived cells in chimeric embryos (Figures S4D and S4E). Aborted embryos generally showed higher integration of GFP-expressing cells (Figure S5D). Intriguingly, we found that NMR iPSC-derived cells could integrate into both placenta and normal fetus (Figure S5E), suggesting their contribution to embryonic and extra-embryonic tissues. We further examined the identity of these GFP-positive cells by immunostaining with different lineage markers such as TUJ-1 (ectoderm) and  $\alpha$ -ACTININ (mesoderm) (Figure 4B). In several chimeric embryos, we found that GFP-positive cells co-expressed appropriate lineage-specific markers in aborted embryo and normal fetuses (Figures 4C and 4D). Together, these data suggest that NMR iPSC-derived cells could repopulate into the mouse early embryos with further differentiation and contribute to interspecies chimera.

### Comparative Gene Expression Analyses of Mouse, Human, and NMR iPSCs

To gain insights into similarities and differences in gene expression among mouse, human, and NMR iPSCs, we performed RNA sequencing (RNA-seq) analyses of six lines of fibroblasts and their respective iPSC lines of the NMR. Principal-component analysis revealed tight clustering of all iPSCs and their split from the cells of origin (Figure 5A). Next, we performed RNA-seq analyses of four mouse fibroblast lines and the respective iPSCs, which were generated in parallel with the NMR iPSCs. We also used a published human fibroblast/iPSC dataset (Choi et al., 2015). First, we identified differentially expressed genes (DEGs) between fibroblasts and iPSCs for each species (Figure 5B), revealing elevated expression of 2,799 mouse, 1,027 NMR, and 3,852 human genes in iPSCs. These corresponded to 42 gene ontology (GO) terms in mouse, 43 in NMR, and 61 in human (Figures S5A–S5C). Interestingly, 23 GO terms overlapped between NMR and human iPSCs, which were related to cell morphogenesis, ion transport, and neuronal function, whereas only 3 GO terms were common to mouse and NMR iPSCs (Figure 5C). Next, we found 151 DEGs overlapped among NMR, human, and mouse iPSCs by gene symbol (Figure 5D). Excluding common 151 DEGs, only 91 DEGs overlapped between NMR and mouse iPSCs, whereas 218 DEGs overlapped between NMR and human iPSCs. The data suggest that the reprogramming-associated transcriptome changes in NMR cells are more similar to those of human cells.

### DISCUSSION

We report the development and characterization of NMR iPSCs and describe protocols for robust preparation of these cells. The NMR is a mouse-sized rodent, but viable NMR iPSCs could not be generated by employing a conventional system that supports mouse iPSCs derivation. Although we observed altered expression of reprogramming-associated genes (*Ecad*, *Esrrb*, *Utf1*, and *Sox2*) and detected OCT4-expressing cells, this procedure did not lead to reprogramming. However, further analyses revealed the importance of N2B27 medium for NMR iPSC derivation. We also found that LIF+2i conditions, which activate LIF/STAT3 and Wnt/

### Figure 3. Propensity of NMR Fibroblasts and iPSCs for a Tetraploid Karyotype

- (A) Percentage of diploid and tetraploid NMR fibroblasts and iPSCs based on karyotype analyses. n, number of cells with chromosome counts. Seven NMR fibroblast and 12 NMR iPSC lines were analyzed.
- (B) Karyotype analysis showing tetraploid karyotypes of NMR embryonic fibroblasts and iPSCs. Adult fibroblasts show a mostly diploid karyotype.
- (C) DNA content of NMR embryonic fibroblasts and iPSCs as analyzed by fluorescence-activated cell sorting.
- (D) Changes in the DNA content during reprogramming and differentiation in embryonic and adult cells.
- (E) Changes in the DNA content of NMR adult fibroblasts during long-term culture.





**A**

| Injected cells | Injected blastocysts | No. of embryos | Normal embryo | Aborted embryo | E13.5 development (%) |
|----------------|----------------------|----------------|---------------|----------------|-----------------------|
| NMR GFP iPSCs  | 28                   | 28             | 14            | 14             | 50.0                  |

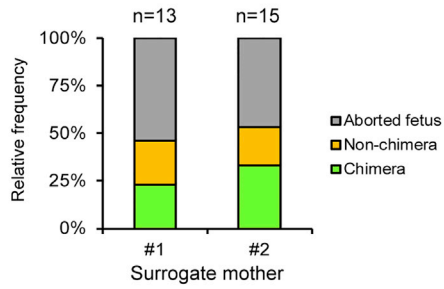

**B**

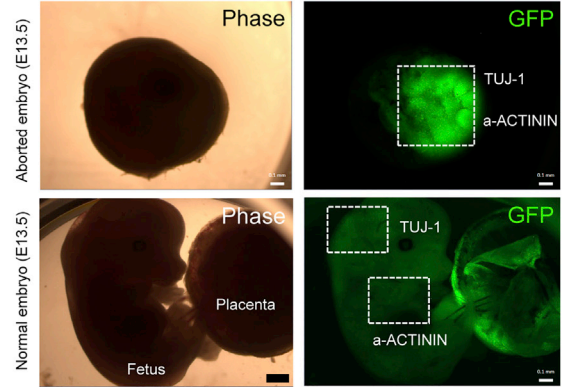

**C**

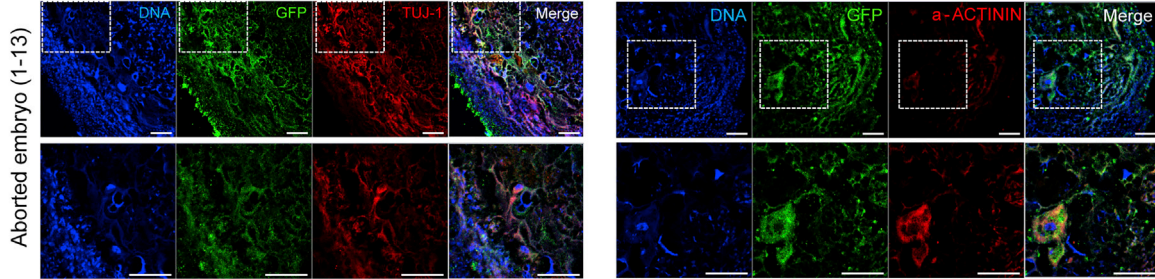

**D**

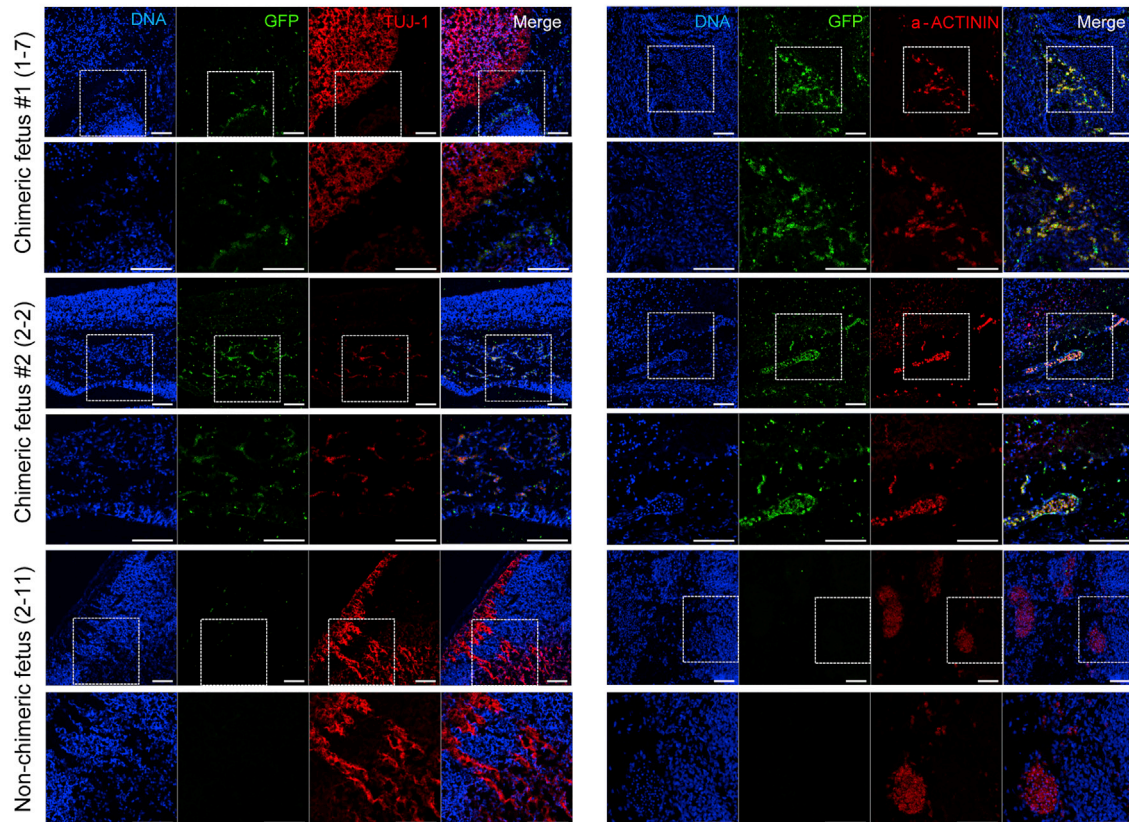

(legend on next page)

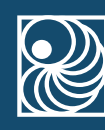

$\beta$ -catenin signaling, inhibit FGF/MEK, and support naive PSCs across species (Ye et al., 2014), were necessary and sufficient for inducing and maintaining pluripotency of NMR cells. Also, N2B27-3i was superior to N2B27-2i, highlighting positive influence of the ALK5 inhibitor A83-01, as previously reported for rat iPSCs (Li et al., 2009). In addition, we examined appropriate conditions for feeder-free monolayer culture and found that NMR iPSCs grown on Matrigel maintained AP expression. This finding opens opportunities for feeder-free iPSC culture, transfection, and cell differentiation without EB formation. We further found that the expression of SV40 large T accelerated reprogramming of NMR iPSCs. Although this factor did not seem to alter the reprogramming efficiency (0.17% versus 0.24%), the reprogramming time was significantly reduced (16 versus 30 days).

The resulting iPSCs could be maintained for prolonged periods of time, with no notable difference in morphology after 30 passages. These cells expressed typical markers of pluripotency and differentiated into all three germ layers. On the other hand, some phenotypes of the NMR iPSCs were different from those of iPSCs from other species. For example, we found that NMR iPSCs were resistant to forming teratoma when injected into the mouse renal tubule, instead forming nerves, consistent with tumor resistance from early development stages. It is interesting that NMR iPSCs may be able to differentiate *in vivo* without forming tumors. It is an attractive possibility that these approaches may lead to the development of tumor-free iPSCs for therapeutic applications. Besides, NMR iPSCs showed a propensity for tetraploidy, which was observed in various culture models and was more prevalent in embryonic cells. Although tetraploidy may be associated with abnormality in cells, in the NMR this phenotype appeared regardless of cells and conditions used. Inappropriate tetraploidization is a frequent event in early stages of cancer development (Davoli and de Lange, 2011). However, despite a high percent of tetraploid cells, NMR iPSCs contributed to interspecific chimera and did not give rise to teratoma. In the mouse, tetraploid ESCs possess essential pluripotency, differentiation potency to form teratoma, and

show contribution to the inner cell masses in aggregated chimeric blastocysts (Imai et al., 2015). Besides, the viable tetraploid mammal *Tympanoctomys barrerae* (Octodontidae) displays genomic imprinting and X-chromosome inactivation, which is partially conserved in the tetraploid genome (Bacquet et al., 2008). Future comprehensive epigenetic or genomic analyses are necessary to elucidate these characteristics of embryonic fibroblasts and iPSCs in the NMR. These characteristics may be related to known NMR phenotypes, e.g., early contact inhibition and resistance to cancer.

When our study was prepared for publication, another group reported the development of NMR iPSCs (Miyawaki et al., 2016). They also found resistance to teratoma formation and attributed this feature to elevated *Arf* expression. We used a different procedure to derive iPSCs and found that they could be generated at low oxygen and with a higher (~30-fold) efficiency of reprogramming in the case of adult fibroblasts. Most importantly, we demonstrated chimeric contribution of NMR iPSCs for robust evidence of pluripotency. The availability of different iPSC reagents, especially since they differ in their characteristics, should be of great benefit to the research community.

The teratoma phenotype of our iPSCs prompted us to examine the ability of NMR iPSCs to contribute to embryonic development of mice. Interspecific chimera were generated several years ago using mouse blastocysts injected with rat iPSCs and rat blastocysts injected with mouse iPSCs (Kobayashi et al., 2010). Both mouse and rat iPSCs could contribute to various cell types of the embryos and adult animals (Kobayashi et al., 2010). More recently, chimera models were developed involving rhesus monkey and human cells (Fang et al., 2014; Mascetti and Pedersen, 2016). We found that NMR iPSCs could contribute to embryonic development when injected into mouse blastocysts, followed by implantation. Although NMRs are characterized by slower development (~70-day gestation period) compared with mouse (19–21 days), apparently NMR cells could divide and differentiate within mouse embryos, at least until E13.5. They were also detected in the placenta and contributed to fetus through different

#### Figure 4. Interspecific Chimera

(A) Summary of interspecies chimera production (E13.5). Relative frequencies of aborted, non-chimeras, and chimeras during embryonic development from two surrogated mothers (bottom panel). Data from genotyping results. See also Figure S4D.

(B) Representative images showing an aborted embryo and a normal embryo (E13.5). White boxes indicate the sagittal section of brain and heart regions in a normal fetus (bottom panel). Scale bars, 100  $\mu$ m.

(C) Representative images showing the integration of NMR iPSC-derived cells into mouse E13.5 aborted embryos (embryo number; 1–13 from Figure S4D). Anti-GFP antibody was co-stained with anti-TUJ1 (left panels) and anti-a-ACTININ (right panels) antibodies. The bottom panels are enlargements of the white boxes. Scale bars, 100  $\mu$ m.

(D) Representative images showing the integration of NMR iPSC-derived cells into mouse E13.5 normal fetuses (embryo number; 1–7 and 2–2 from Figure S4D). Non-chimera as control (embryo number; 2–11 from Figure S4D). Anti-GFP antibody was co-stained with anti-TUJ1 (left panels) and anti-a-ACTININ (right panels) antibodies. The bottom panels are enlargements of the white boxes. Scale bars, 100  $\mu$ m.

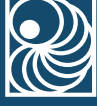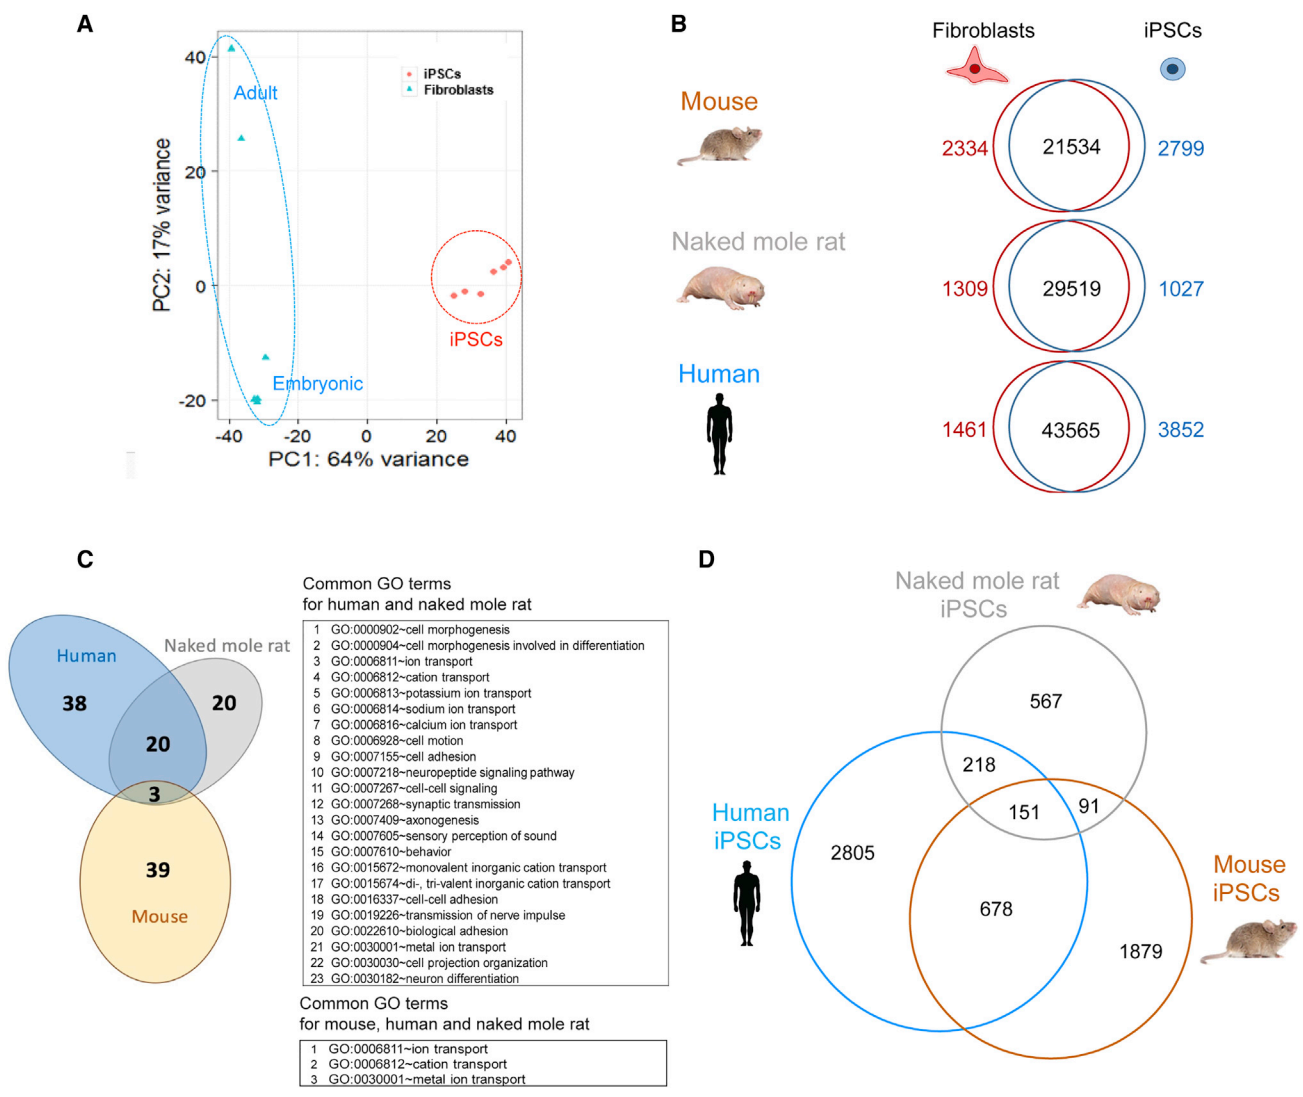

**Figure 5. Gene Expression Analysis of Mouse, NMR, and Human iPSCs**

(A) Principal-component analysis of global gene expression patterns of NMR fibroblasts and iPSCs derived from them. (B) Venn diagrams showing pairwise comparison of gene expression. Red and blue numbers denote differentially expressed genes (false discovery rate < 0.05 and fold-change > 2); black numbers denote expressed genes with no significant differences between indicated samples. (C) Venn diagram showing common GO terms among NMR, human, and mouse. The set of 23 (NMR/human) and 3 (NMR/mouse or human/mouse) GO terms is shown. See also Figure S5. (D) Venn diagram showing unique and common differentially expressed genes in NMR, human and mouse iPSCs.

lineages such as ectoderm (TUJ-1) and mesoderm (a-ACTININ). To produce interspecific chimera, genetic diversification and evolutionary distance should be considered as they form a “xenobarrier” (Wu et al., 2016). Interestingly, the chimeric contribution of NMR cells to the mouse embryo was successful despite the great evolutionary distance (70 million years). Analysis of chimeric embryos suggested a possibility of naive pluripotency of the NMR iPSCs, and an opportunity of production of fully developed interspecific chimera between mouse and NMR.

We also examined gene expression changes associated with reprogramming of NMR cells, and these were more similar to those of human than mouse iPSCs. Interestingly, despite the fact that the ancestor of mouse and NMR diverged from the ancestor of humans about 93 million years ago, NMR iPSCs share more common GO terms with human iPSCs than with mouse iPSCs. Although NMR is a rodent, NMRs and humans are characterized by extended lifespans and longer gestation periods, especially compared with what would be expected based on their body sizes.



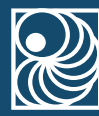

Our study highlights potential uses of the developed NMR iPSCs for various types of biomedical applications. We showed that they could differentiate into various cell types, be implanted into embryos, and be manipulated genetically despite their propensity for tetraploidy. Previously, studies involving NMRs were limited to the analyses of live animals and tissue samples. Very few cell culture studies have been performed, and they were limited to adult fibroblasts. In addition, no cell lines have been reported for NMR, precluding characterization of the remarkable phenotypes associated with this animal. With the development of NMR iPSCs, some of the major hurdles in NMR research may be overcome, accelerating studies on the phenotypes of these extraordinary animals.

## EXPERIMENTAL PROCEDURES

### Animal Ethics

The animal welfare, use, and care were carried out according to the protocols approved by the Institutional Animal Care and Use Committee of the Brigham and Women's Hospital, Harvard University, and University of Illinois-Chicago.

### Isolation and Culture of Embryonic and Adult Fibroblasts

NMRs used in this work were from the facility at University of Illinois in Chicago. The NMR embryos were harvested at the early stage of fetogenesis, ~45 days postcoitum. Each fetus was harvested and dissected, voided of internal organs and brain, and the remaining part was washed in sterile PBS to remove remaining blood. Each fetus was teased into fine pieces in 5 mL of 0.25% trypsin-EDTA solution, transferred into a 15 mL tube, and digested overnight at 4°C. DMEM with 20% fetal bovine serum (FBS) was added to inactivate trypsin and tissues were pipetted vigorously and repeatedly to break up the digested tissues into a cell suspension. The cells were plated onto cell culture plates and incubated in a humidified incubator at 32°C with 3% O<sub>2</sub> and 5% CO<sub>2</sub> atmosphere. Adherent cells were NMR embryonic fibroblasts. Adult fibroblasts were established from kidney, testis, and skin of a 1-year-old male. Mouse embryonic and adult fibroblasts were from mouse fetus (E13.5) and lung of a 10-week-old C57BL/6 male, respectively. Both NMR and mouse fibroblasts were maintained in DMEM (DMEM high glucose + GlutaMAX) with 10% (mouse) and 15% (NMR) FBS, 1× antibiotic/antimycotic, 1× non-essential amino acids, 0.1 mM β-mercaptoethanol. All NMR cells were cultured at 32°C or 37°C, 3% O<sub>2</sub>, and 5% CO<sub>2</sub>, while mouse cells were cultured at 37°C and 5% CO<sub>2</sub>. NMR fibroblasts used in this study are listed in [Table S1](#).

### Reprogramming of Mouse and NMR Fibroblasts to iPSCs

After 1 day of lentiviral transduction, approximately 100,000 infected fibroblasts were seeded per well of 6-well plate. Three different culture conditions were used to test the ability of cells

to reprogram. First, lentiviral infected mouse and NMR fibroblasts were grown onto mytomycin C-inactivated or gamma-irradiated MEF feeder cells in ESC medium in the presence of 2 mg/mL doxycycline (DMEM supplemented with 15% FBS, 1,000 units/mL mouse LIF or 10 ng/mL basic fibroblast growth factor, 0.1 mM β-mercaptoethanol, 1% non-essential amino acids, 2 mM glutamine, and 1% antibiotic/antimycotic). The other conditions also represented the culture of infected fibroblasts grown on MEF feeder cells or Matrigel matrix, but we used N2/B27+2i medium (1:1 mixture of N2 medium [DMEM/F12 supplemented with 1× N2], 1% antibiotic/antimycotic, 0.005% BSA, 0.1 mM β-mercaptoethanol, and 1% non-essential amino acids) and B27 medium (neurobasal medium supplemented with 1× B27 [without retinoic acid], 1% antibiotic/antimycotic, 2 mM L-glutamine, 0.1 mM β-mercaptoethanol, 0.005% BSA, and 1% non-essential amino acids) supplemented with 1,000 U/mL mLIF, 3 μM GSK3b inhibitor (CHIR99021), and 1 μM MEK1/2 inhibitor (PD0325901). In each of two culture conditions, growth media were replaced every 24 hr.

### AP Staining and Immunofluorescence

AP staining was performed using the Alkaline Phosphatase Staining Kit (Stemgent) according to manufacturer's instructions. For fluorescence immunocytochemistry, iPSCs were cultured on mitotically inactivated MEFs for 2–3 days in the case of mouse iPSCs and for 6–7 days in the case of NMR iPSCs, and fixed using PBS containing 4% paraformaldehyde (Sigma) for 15 min at room temperature. After rinsing with PBS, fixed cells were blocked and permeabilized for 1 hr in PBS containing 10% (v/v) goat serum (Sigma) in 0.1% Triton X-100-PBS. Primary antibodies were as follows: OCT4 (Santa Cruz Biotech; sc-5279), SOX2 (Millipore; AB5603), NANOG (Millipore; AB5731), and SSEA-1 (Santa Cruz Biotech; sc-21702), which were diluted 1:200 in blocking solution. Fixed cells were incubated with primary antibody overnight at 4°C. After washing out the unbound antibodies, fixed cells were incubated with secondary antibodies (labeled with Alexa 488, 1:200 dilution, Jackson ImmunoResearch; 111-545-144, 115-545-003) for 1 hr at room temperature. Nuclei were counterstained using 1 μg/mL Hoechst 33342 (Life Technologies; H3570). All fluorescence imaging was conducted using an LSM 700 confocal microscope (Zeiss).

### Teratoma Formation

NMR iPSCs or EGFP-expressed iPSCs grown on Matrigel were collected by 0.05% trypsin treatment and injected under the kidney capsules into non-obese diabetic (NOD)-SCID (NOD.CB17-Prkdc/J) mice. The kidney capsules were collected 10 weeks after the injection and processed for paraffin embedding and H&E staining or immunofluorescence co-staining with primary polyclonal antibodies against GFP (chicken IgY; Invitrogen; A10262) and TUJ-1 (1:500, Covance; MMS-435P). Secondary antibodies were Alexa 488-conjugated anti-chicken IgY (Invitrogen; A-11039) and Alexa Fluor 647 anti-rabbit IgG (1:200 dilution, Jackson ImmunoResearch; 111-607-003). Genomic DNA of kidney capsules was extracted using a DNeasy Blood & Tissue Kit (QIAGEN). PCR with GoTaq polymerase using specific primers to M2rtTA lentiviral vector was performed to confirm the origin of NMR iPSCs in the kidney capsules.

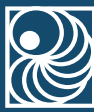

## Karyotype Analysis

Karyotyping was performed at the Cytogenetics Core Laboratory in Brigham and Women's Hospital using standard protocols for chromosomal G-banding.

## RT-PCR and Real-Time PCR Analysis

To perform qPCR, total RNA from individual samples was extracted using TRIzol reagent (Invitrogen, MA) according to the manufacturer's instructions. cDNA was synthesized using a High Capacity RNA-to-cDNA Kit (Applied Biosystems, CA). PCR primers are listed in Table S2. Relative gene expression was calculated by normalizing the threshold cycle (Ct) values of each gene to that of the GAPDH via the  $\Delta$ -Ct method (Livak and Schmittgen, 2001).

## Interspecies Chimera Production

To generate chimeric mouse embryos containing NMR iPSCs, C57BL/6-derived blastocysts injected with EGFP-expressed NMR iPSCs were transplanted into the uteri of foster mothers (ICR; CD1 mouse). The generated chimera features were analyzed at E13.5. They were fixed with 4% paraformaldehyde, embedded for frozen sectioning in optimum cutting temperature compound, and co-immunostained with primary polyclonal antibodies against GFP (chicken IgY; Invitrogen) and TUJ-1 (1:500, Covance; MMS-435P), or  $\alpha$ -ACTININ (1:200, Sigma; A7732). Secondary antibodies were Alexa 488-conjugated anti-chicken IgY (Invitrogen; A10262) and Alexa Fluor 647 anti-rabbit or -mouse IgG (1:200 dilution, Jackson ImmunoResearch; 111-607-003, 115-605-206). Genomic DNA of chimeric mouse embryos was extracted using DNeasy Blood & Tissue Kit (QIAGEN). PCR with GoTaq polymerase using the same primers as in the teratoma formation section was performed to confirm the origin of NMR iPSCs in the embryos.

## RNA-Seq and Data Analysis

Total RNA was extracted from mouse and NMR samples using an RNeasy Plus Kit (QIAGEN). Short-insert, paired-end libraries were prepared using the Illumina TruSeq Sample Preparation Kit v2, and sequenced bidirectionally (101 bp in each direction) on Illumina HiSeq 2000 (Illumina, San Diego, CA). *Mus musculus* (GRCm38) and *Heterocephalus glaber* (hetGla2) reference genomes and annotation files were from the NCBI. Differential gene expression analysis for RNA-seq data was performed as follows: FastQC package (version 0.11.4) was used for quality control, raw data were trimmed using Trim\_Galore (version 0.4.0) and aligned to a reference genome using TopHat2 (version 2.0.9); Bowtie 2.1.0.0 was used for aligning reads to genes. Transcripts were assembled using Cufflinks, and feature counts performed using a Python package HTseq. A generated simple-count matrix was used for follow-up analysis based on EdgeR and DESeq. Raw sequencing data for 20 biological samples have been deposited into the Short Read Archive database under accession number SRA: SRP116326. Human fibroblast and iPSC datasets were from GEO: GSE36552 (Choi et al., 2015).

## Statistical Analysis

Statistical analyses were performed using a two-tailed t test (\*t test,  $p < 0.05$ ; \*\*t test,  $p < 0.001$ ). Values are shown as the mean  $\pm$  SEM of multiple independent experiments, not technical replicates.

## SUPPLEMENTAL INFORMATION

Supplemental Information includes Supplemental Experimental Procedures, five figures, and two tables and can be found with this article online at <https://doi.org/10.1016/j.stemcr.2017.09.013>.

## AUTHOR CONTRIBUTIONS

S.G.L. and A.E.M. performed iPSC experiments, and S.H.Y., J.K.P., K.H.C., R.T.B., C.K.L., and T.J.P. contributed to their characterization or performed other biological experiments. S.G.L. and A.V.L. analyzed RNA-seq data, and V.N.G. supervised the study. S.G.L. and V.N.G. prepared the manuscript, with contribution from all other authors.

## ACKNOWLEDGMENTS

We thank Dr. Lin Wu and the Genome Modification Facility, Harvard University, for technical assistance with teratoma and chimera assays. This work was supported by NIH AG047745, CA080946, and AG047200, by the Glenn Foundation, and by the Next-Generation BioGreen 21 Program (no. PJ01130012015), Republic of Korea.

Received: September 9, 2016

Revised: September 14, 2017

Accepted: September 15, 2017

Published: October 26, 2017

## REFERENCES

- Bacquet, C., Imamura, T., Gonzalez, C.A., Conejeros, I., Kausel, G., Neildez-Nguyen, T.M., Paldi, A., and Gallardo, M.H. (2008). Epigenetic processes in a tetraploid mammal. *Mamm. Genome* *19*, 439–447.
- Bao, L., He, L., Chen, J., Wu, Z., Liao, J., Rao, L., Ren, J., Li, H., Zhu, H., Qian, L., et al. (2011). Reprogramming of ovine adult fibroblasts to pluripotency via drug-inducible expression of defined factors. *Cell Res.* *21*, 600–608.
- Buffenstein, R., and Yahav, S. (1991). Is the naked mole-rat (*Heterocephalus glaber*) an endothermic yet poikilothermic mammal? *J. Therm. Biol.* *16*, 227–232.
- Brook, F.A., and Gardner, R.L. (1997). The origin and efficient derivation of embryonic stem cells in the mouse. *Proc. Natl. Acad. Sci. USA* *94*, 5709–5712.
- Buehr, M., Meek, S., Blair, K., Yang, J., Ure, J., Silva, J., McLay, R., Hall, J., Ying, Q.L., and Smith, A. (2008). Capture of authentic embryonic stem cells from rat blastocysts. *Cell* *135*, 1287–1298.
- Buganim, Y., Faddah, D.A., Cheng, A.W., Itskovich, E., Markoulaki, S., Ganz, K., Klemm, S.L., van Oudenaarden, A., and Jaenisch, R. (2012). Single-cell expression analyses during cellular reprogramming reveal an early stochastic and a late hierarchic phase. *Cell* *150*, 1209–1222.
- Carey, B.W., Markoulaki, S., Hanna, J., Saha, K., Gao, Q., Mitalipova, M., and Jaenisch, R. (2009). Reprogramming of murine and human somatic cells using a single polycistronic vector. *Proc. Natl. Acad. Sci. USA* *106*, 157–162.



- Chen, T., Yuan, D., Wei, B., Jiang, J., Kang, J., Ling, K., Gu, Y., Li, J., Xiao, L., and Pei, G. (2010). E-cadherin-mediated cell-cell contact is critical for induced pluripotent stem cell generation. *Stem Cells* 28, 1315–1325.
- Chin, M.H., Mason, M.J., Xie, W., Volinia, S., Singer, M., Peterson, C., Ambartsumyan, G., Aimiwu, O., Richter, L., Zhang, J., et al. (2009). Induced pluripotent stem cells and embryonic stem cells are distinguished by gene expression signatures. *Cell Stem Cell* 5, 111–123.
- Choi, J., Lee, S., Mallard, W., Clement, K., Tagliazucchi, G.M., Lim, H., Choi, I.Y., Ferrari, F., Tsankov, A.M., Pop, R., et al. (2015). A comparison of genetically matched cell lines reveals the equivalence of human iPSCs and ESCs. *Nat. Biotechnol.* 33, 1173–1181.
- Davoli, T., and de Lange, T. (2011). The causes and consequences of polyploidy in normal development and cancer. *Ann. Rev. Cell Dev. Biol.* 27, 585–610.
- Deng, Y., Liu, Q., Luo, C., Chen, S., Li, X., Wang, C., Liu, Z., Lei, X., Zhang, H., Sun, H., et al. (2012). Generation of induced pluripotent stem cells from buffalo (*Bubalus bubalis*) fetal fibroblasts with buffalo defined factors. *Stem Cells Dev.* 21, 2485–2494.
- Edrey, Y.H., Park, T.J., Kang, H., Biney, A., and Buffenstein, R. (2011). Endocrine function and neurobiology of the longest-living rodent, the naked mole-rat. *Exp. Gerontol.* 46, 116–123.
- Esteban, M.A., Xu, J., Yang, J., Peng, M., Qin, D., Li, W., Jiang, Z., Chen, J., Deng, K., Zhong, M., et al. (2009). Generation of induced pluripotent stem cell lines from Tibetan miniature pig. *J. Biol. Chem.* 284, 17634–17640.
- Evans, M.J., and Kaufman, M.H. (1981). Establishment in culture of pluripotential cells from mouse embryos. *Nature* 292, 154–156.
- Ezashi, T., Telugu, B.P., Alexenko, A.P., Sachdev, S., Sinha, S., and Roberts, R.M. (2009). Derivation of induced pluripotent stem cells from pig somatic cells. *Proc. Natl. Acad. Sci. USA* 106, 10993–10998.
- Fang, R., Liu, K., Zhao, Y., Li, H., Zhu, D., Du, Y., Xiang, C., Li, X., Liu, H., Miao, Z., et al. (2014). Generation of naive induced pluripotent stem cells from rhesus monkey fibroblasts. *Cell Stem Cell* 15, 488–496.
- Hanna, J., Markoulaki, S., Mitalipova, M., Cheng, A.W., Cassady, J.P., Staerk, J., Carey, B.W., Lengner, C.J., Foreman, R., Love, J., et al. (2009a). Metastable pluripotent states in NOD-mouse-derived ESCs. *Cell Stem Cell* 4, 513–524.
- Hanna, J., Saha, K., Pando, B., van Zon, J., Lengner, C.J., Creighton, M.P., van Oudenaarden, A., and Jaenisch, R. (2009b). Direct cell reprogramming is a stochastic process amenable to acceleration. *Nature* 462, 595–601.
- Hockemeyer, D., Soldner, F., Cook, E.G., Gao, Q., Mitalipova, M., and Jaenisch, R. (2008). A drug-inducible system for direct reprogramming of human somatic cells to pluripotency. *Cell Stem Cell* 3, 346–353.
- Honda, A., Hirose, M., Hatori, M., Matoba, S., Miyoshi, H., Inoue, K., and Ogura, A. (2010). Generation of induced pluripotent stem cells in rabbits: potential experimental models for human regenerative medicine. *J. Biol. Chem.* 285, 31362–31369.
- Hong, H., Takahashi, K., Ichisaka, T., Aoi, T., Kanagawa, O., Nakagawa, M., Okita, K., and Yamanaka, S. (2009). Suppression of induced pluripotent stem cell generation by the p53-p21 pathway. *Nature* 460, 1132–1135.
- Huang, B., Li, T., Alonso-Gonzalez, L., Gorre, R., Keatley, S., Green, A., Turner, P., Kallingappa, P.K., Verma, V., and Oback, B. (2011). A virus-free poly-promoter vector induces pluripotency in quiescent bovine cells under chemically defined conditions of dual kinase inhibition. *PLoS One* 6, e24501.
- Imai, H., Kano, K., Fujii, W., Takasawa, K., Wakitani, S., Hiyama, M., Nishino, K., Kusakabe, K.T., and Kiso, Y. (2015). Tetraploid embryonic stem cells maintain pluripotency and differentiation potency into three germ layers. *PLoS One* 10, e0130585.
- Kim, E.B., Fang, X., Fushan, A.A., Huang, Z., Lobanov, A.V., Han, L., Marino, S.M., Sun, X., Turanov, A.A., Yang, P., et al. (2011). Genome sequencing reveals insights into physiology and longevity of the naked mole rat. *Nature* 479, 223–227.
- Kobayashi, T., Yamaguchi, T., Hamanaka, S., Kato-Itoh, M., Yamazaki, Y., Ibata, M., Sato, H., Lee, Y.S., Usui, J., Knisely, A.S., et al. (2010). Generation of rat pancreas in mouse by interspecific blastocyst injection of pluripotent stem cells. *Cell* 142, 787–799.
- Lewis, K.N., Mele, J., Hornsby, P.J., and Buffenstein, R. (2012). Stress resistance in the naked mole-rat: the bare essentials - a mini-review. *Gerontology* 58, 453–462.
- Li, R., Liang, J., Ni, S., Zhou, T., Qing, X., Li, H., He, W., Chen, J., Li, F., Zhuang, Q., et al. (2010). A mesenchymal-to-epithelial transition initiates and is required for the nuclear reprogramming of mouse fibroblasts. *Cell Stem Cell* 7, 51–63.
- Li, W., Wei, W., Zhu, S., Zhu, J., Shi, Y., Lin, T., Hao, E., Hayek, A., Deng, H., and Ding, S. (2009). Generation of rat and human induced pluripotent stem cells by combining genetic reprogramming and chemical inhibitors. *Cell Stem Cell* 4, 16–19.
- Liang, S., Mele, J., Wu, Y., Buffenstein, R., and Hornsby, P.J. (2010). Resistance to experimental tumorigenesis in cells of a long-lived mammal, the naked mole-rat (*Heterocephalus glaber*). *Aging Cell* 9, 626–635.
- Liao, J., Cui, C., Chen, S., Ren, J., Chen, J., Gao, Y., Li, H., Jia, N., Cheng, L., Xiao, H., et al. (2009). Generation of induced pluripotent stem cell lines from adult rat cells. *Cell Stem Cell* 4, 11–15.
- Livak, K.J., and Schmittgen, T.D. (2001). Analysis of relative gene expression data using real-time quantitative PCR and the 2(-Delta Delta C(T)) method. *Methods* 25, 402–408.
- Luo, J., Suhr, S.T., Chang, E.A., Wang, K., Ross, P.J., Nelson, L.L., Venta, P.J., Knott, J.G., and Cibelli, J.B. (2011). Generation of leukemia inhibitory factor and basic fibroblast growth factor-dependent induced pluripotent stem cells from canine adult somatic cells. *Stem Cells Dev.* 20, 1669–1678.
- Mali, P., Ye, Z., Hommond, H.H., Yu, X., Lin, J., Chen, G., Zou, J., and Cheng, L. (2008). Improved efficiency and pace of generating induced pluripotent stem cells from human adult and fetal fibroblasts. *Stem Cells* 26, 1998–2005.
- Martin, G.R. (1981). Isolation of a pluripotent cell line from early mouse embryos cultured in medium conditioned by teratocarcinoma stem cells. *Proc. Natl. Acad. Sci. USA* 78, 7634–7638.
- Mascetti, V.L., and Pedersen, R.A. (2016). Human-mouse chimerism validates human stem cell pluripotency. *Cell Stem Cell* 18, 67–72.





- Miyawaki, S., Kawamura, Y., Oiwa, Y., Shimizu, A., Hachiya, T., Bono, H., Koya, I., Okada, Y., Kimura, T., Tsuchiya, Y., et al. (2016). Tumour resistance in induced pluripotent stem cells derived from naked mole-rats. *Nat. Commun.* *7*, 11471.
- Mo, X., Li, N., and Wu, S. (2014). Generation and characterization of bat-induced pluripotent stem cells. *Theriogenology* *82*, 283–293.
- Nagy, K., Sung, H.K., Zhang, P., Laflamme, S., Vincent, P., Agha-Mohammadi, S., Woltjen, K., Monetti, C., Michael, I.P., Smith, L.C., et al. (2011). Induced pluripotent stem cell lines derived from equine fibroblasts. *Stem Cell Rev.* *7*, 693–702.
- Omerbasic, D., Smith, E.S., Moroni, M., Homfeld, J., Eigenbrod, O., Bennett, N.C., Reznick, J., Faulkes, C.G., Selbach, M., and Lewin, G.R. (2016). Hypofunctional TrkA accounts for the absence of pain sensitization in the African naked mole-rat. *Cell Rep.* *17*, 748–758.
- Park, I.H., Zhao, R., West, J.A., Yabuuchi, A., Huo, H., Ince, T.A., Lerou, P.H., Lensch, M.W., and Daley, G.Q. (2008). Reprogramming of human somatic cells to pluripotency with defined factors. *Nature* *451*, 141–146.
- Park, T.J., Reznick, J., Peterson, B.L., Blass, G., Omerbasic, D., Bennett, N.C., Kuich, P., Zasada, C., Browe, B.M., Hamann, W., et al. (2017). Fructose-driven glycolysis supports anoxia resistance in the naked mole-rat. *Science* *356*, 307–311.
- Plath, K., and Lowry, W.E. (2011). Progress in understanding reprogramming to the induced pluripotent state. *Nat. Rev. Genet.* *12*, 253–265.
- Samavarchi-Tehrani, P., Golipour, A., David, L., Sung, H.K., Beyer, T.A., Datti, A., Woltjen, K., Nagy, A., and Wrana, J.L. (2010). Functional genomics reveals a BMP-driven mesenchymal-to-epithelial transition in the initiation of somatic cell reprogramming. *Cell Stem Cell* *7*, 64–77.
- Seluanov, A., Hine, C., Azpurua, J., Feigenson, M., Bozzella, M., Mao, Z., Catania, K.C., and Gorbunova, V. (2009). Hypersensitivity to contact inhibition provides a clue to cancer resistance of naked mole-rat. *Proc. Natl. Acad. Sci. USA* *106*, 19352–19357.
- Takahashi, K., Tanabe, K., Ohnuki, M., Narita, M., Ichisaka, T., Tomoda, K., and Yamanaka, S. (2007). Induction of pluripotent stem cells from adult human fibroblasts by defined factors. *Cell* *131*, 861–872.
- Takahashi, K., and Yamanaka, S. (2006). Induction of pluripotent stem cells from mouse embryonic and adult fibroblast cultures by defined factors. *Cell* *126*, 663–676.
- Utikal, J., Polo, J.M., Stadtfeld, M., Maherali, N., Kulalert, W., Walsh, R.M., Khalil, A., Rheinwald, J.G., and Hochedlinger, K. (2009). Immortalization eliminates a roadblock during cellular reprogramming into iPS cells. *Nature* *460*, 1145–1148.
- Wu, J., Greely, H.T., Jaenisch, R., Nakauchi, H., Rossant, J., and Belmonte, J.C. (2016). Stem cells and interspecies chimaeras. *Nature* *540*, 51–59.
- Ye, S., Liu, D., and Ying, Q.L. (2014). Signaling pathways in induced naive pluripotency. *Curr. Opin. Genet. Dev.* *28*, 10–15.
- Ying, Q.L., Wray, J., Nichols, J., Batlle-Morera, L., Doble, B., Woodgett, J., Cohen, P., and Smith, A. (2008). The ground state of embryonic stem cell self-renewal. *Nature* *453*, 519–523.
- Yu, J., Vodyanik, M.A., Smuga-Otto, K., Antosiewicz-Bourget, J., Frane, J.L., Tian, S., Nie, J., Jonsdottir, G.A., Ruotti, V., Stewart, R., et al. (2007). Induced pluripotent stem cell lines derived from human somatic cells. *Science* *318*, 1917–1920.

**Stem Cell Reports, Volume 9**

**Supplemental Information**

**Naked Mole Rat Induced Pluripotent Stem Cells and Their Contribution  
to Interspecific Chimera**

**Sang-Goo Lee, Aleksei E. Mikhailchenko, Sun Hee Yim, Alexei V. Lobanov, Jin-Kyu Park, Kwang-Hwan Choi, Roderick T. Bronson, Chang-Kyu Lee, Thomas J. Park, and Vadim N. Gladyshev**

**Figure S1**

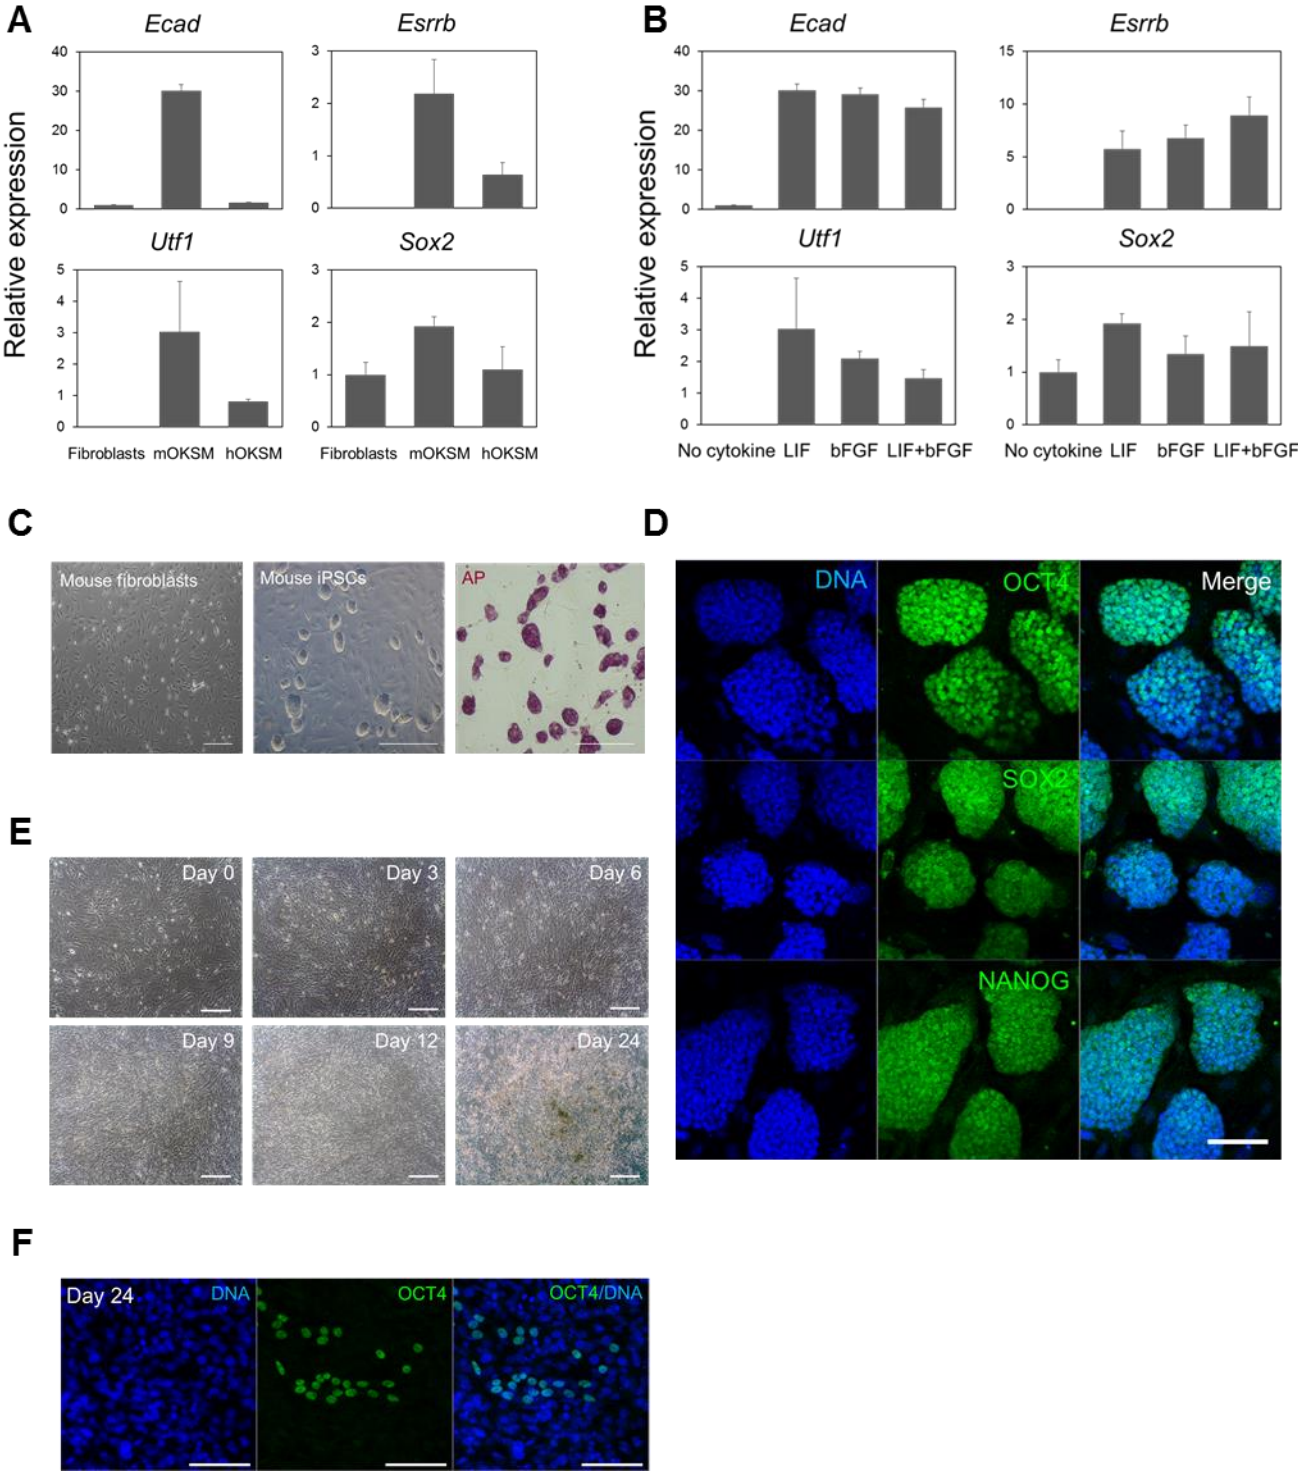



**Figure S2**

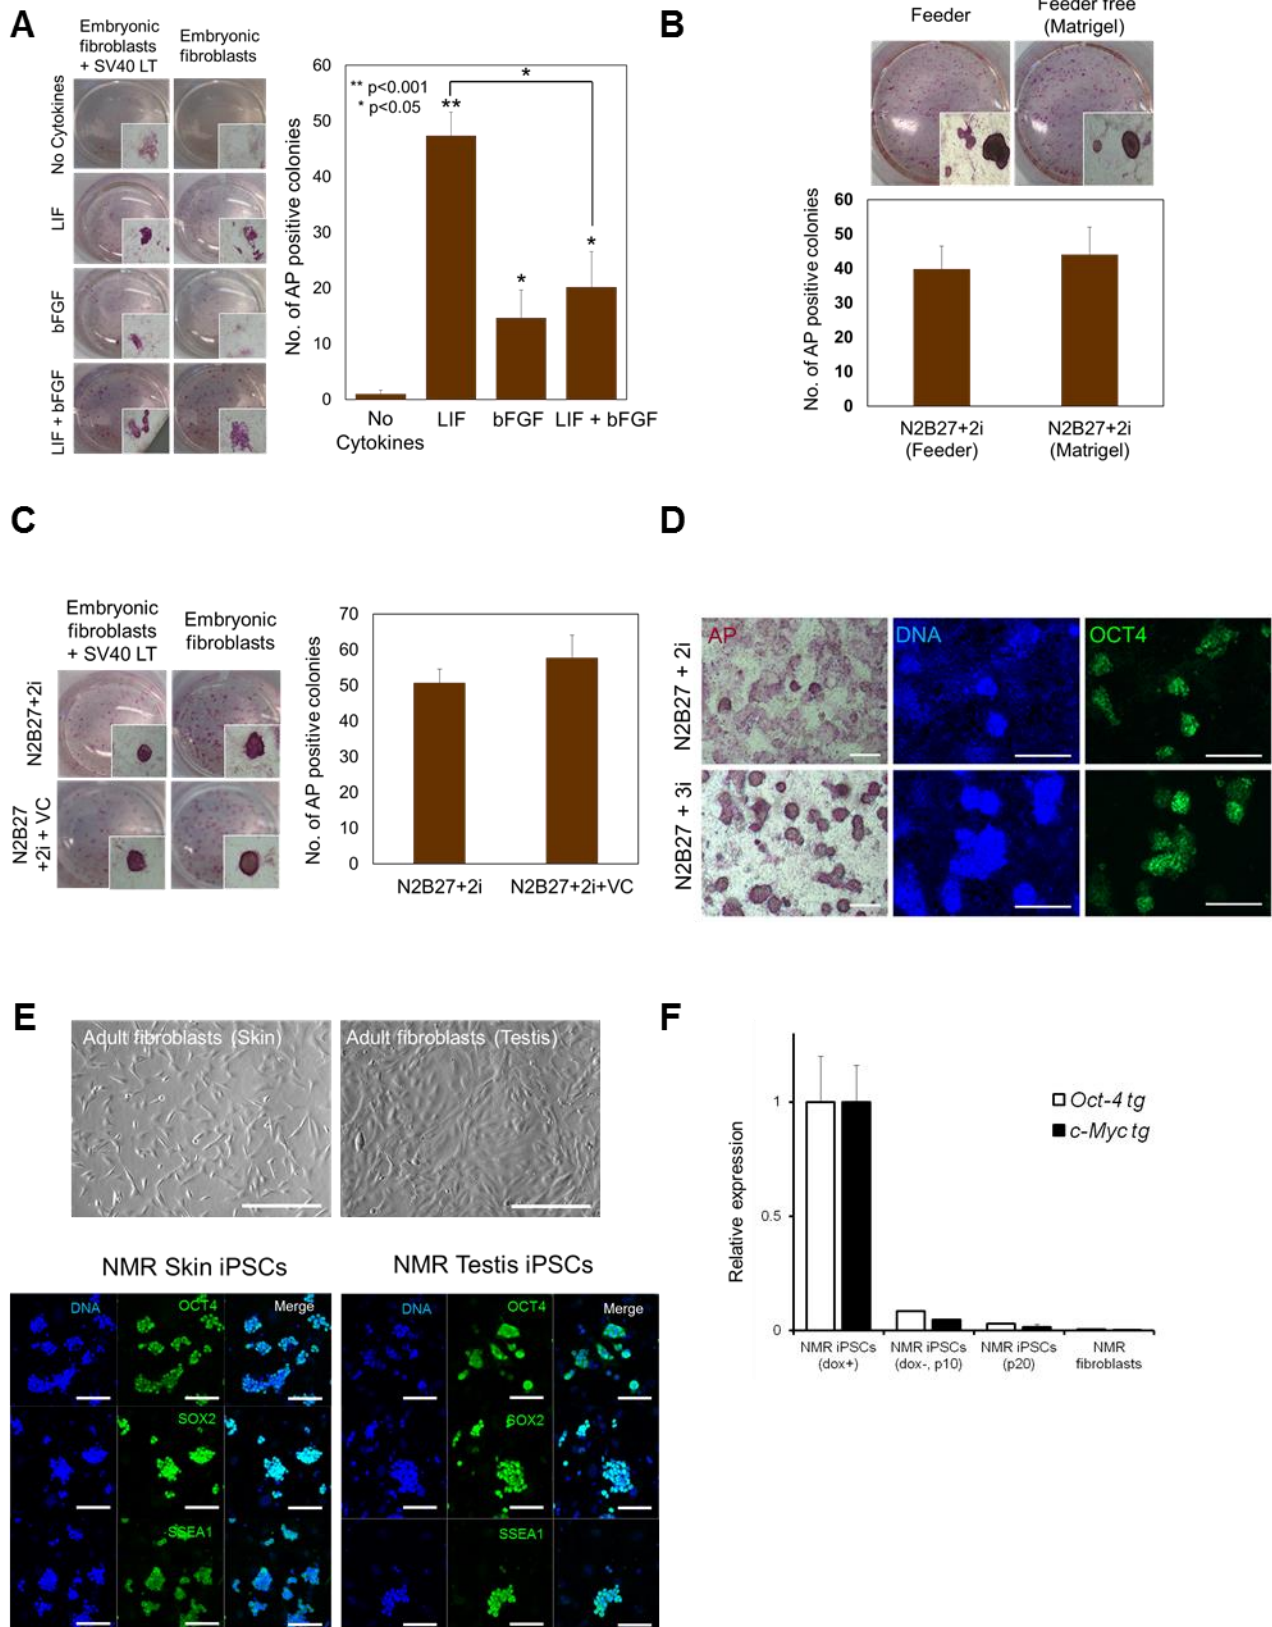

**Figure S3**

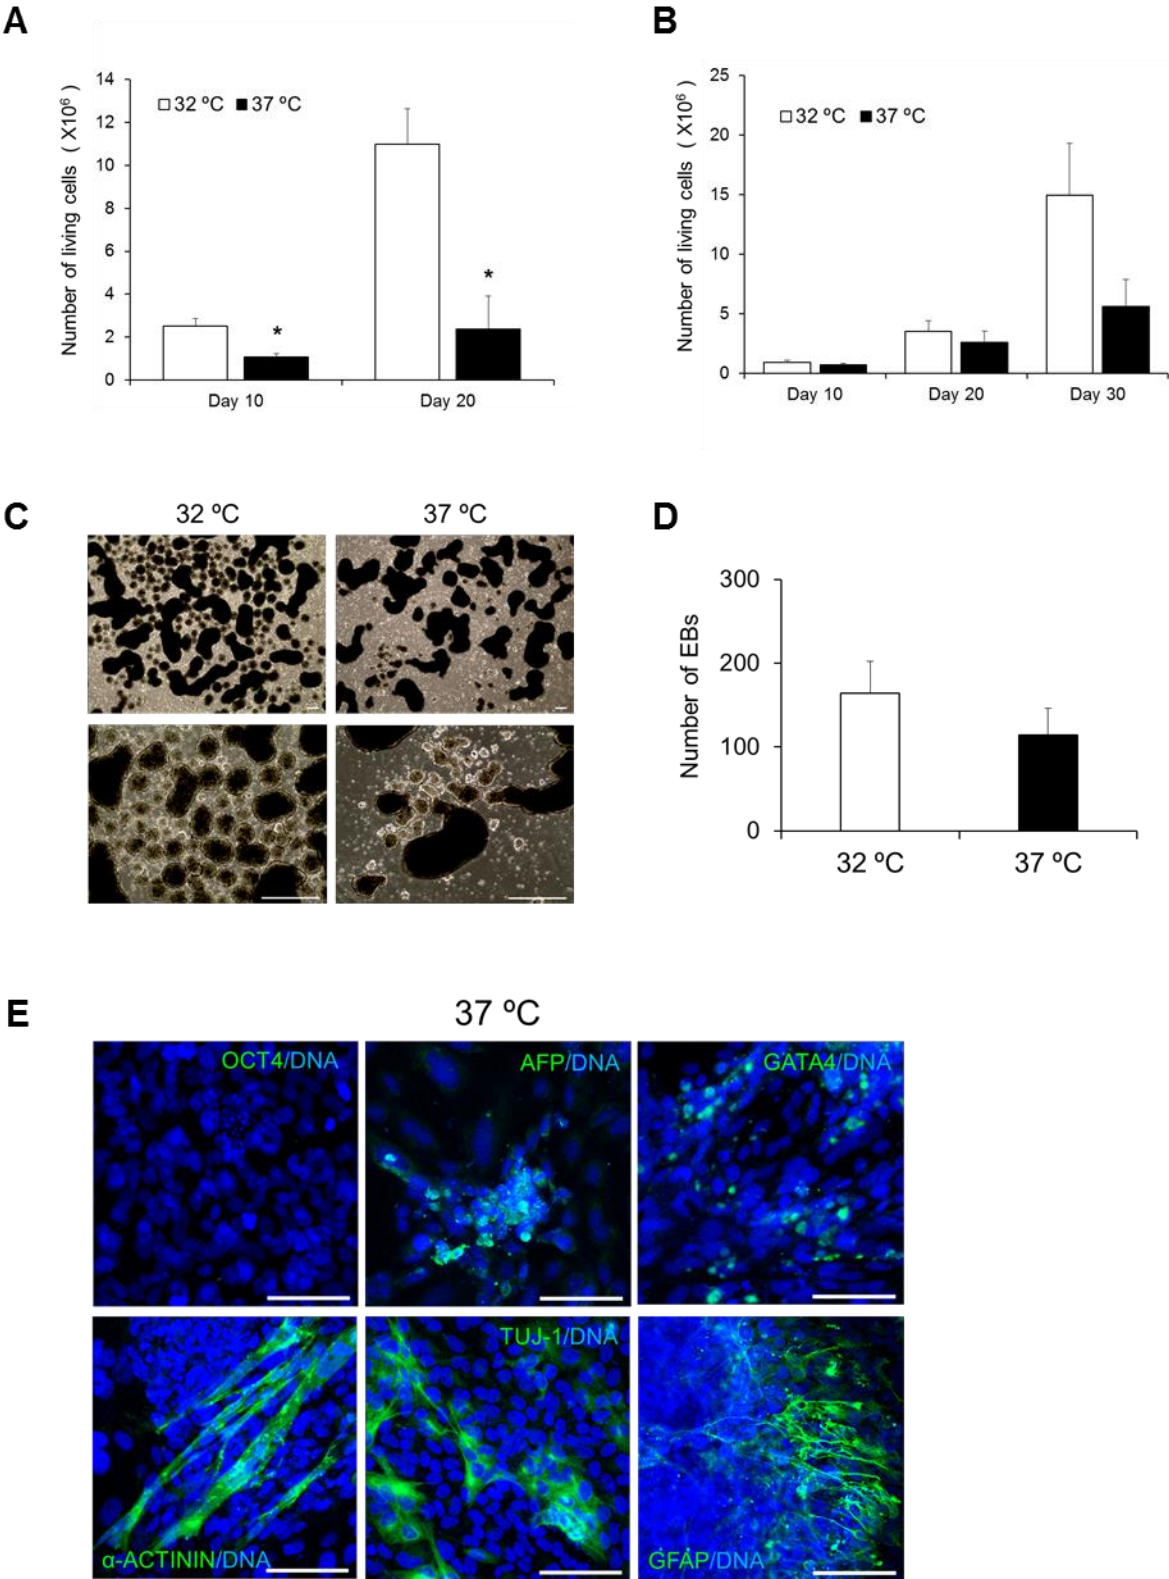

**Figure S4**

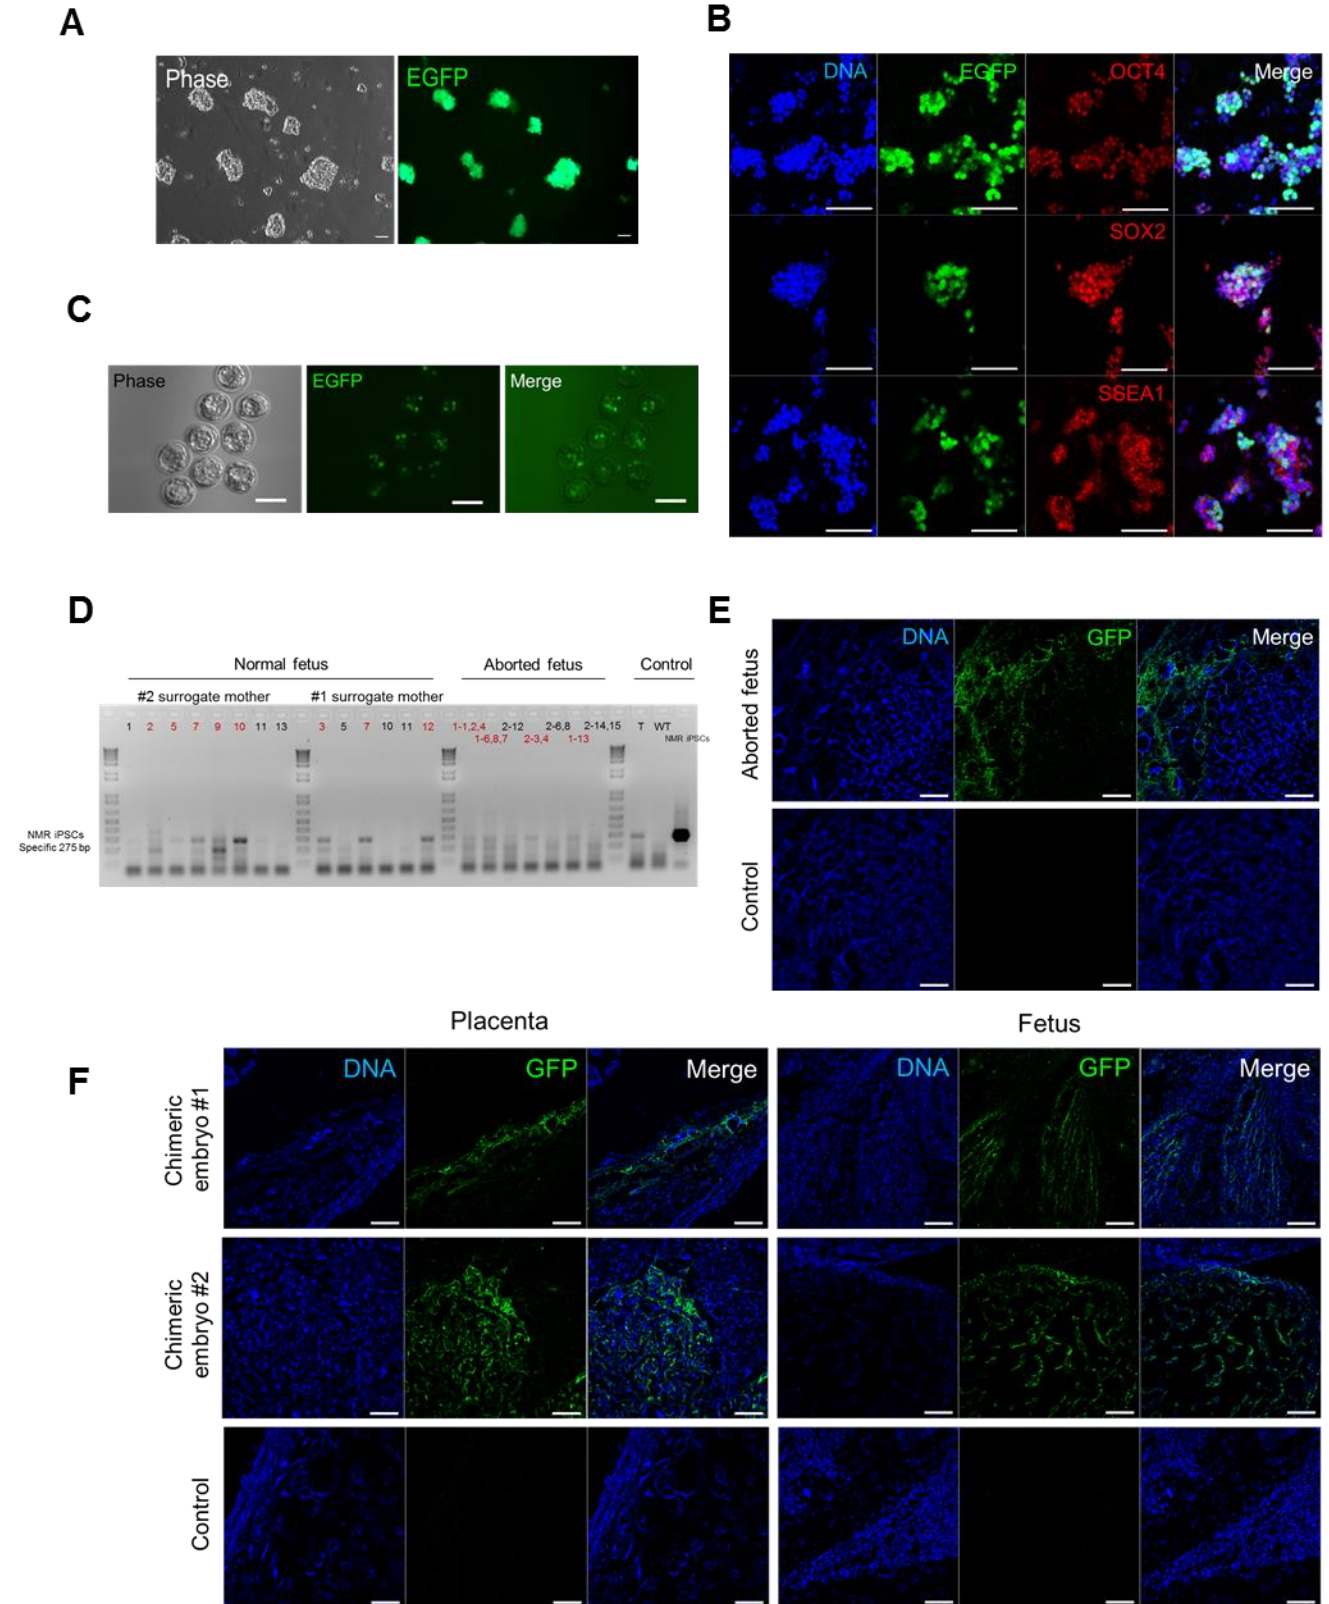



Figure S5A

A. Naked mole rat iPSCs

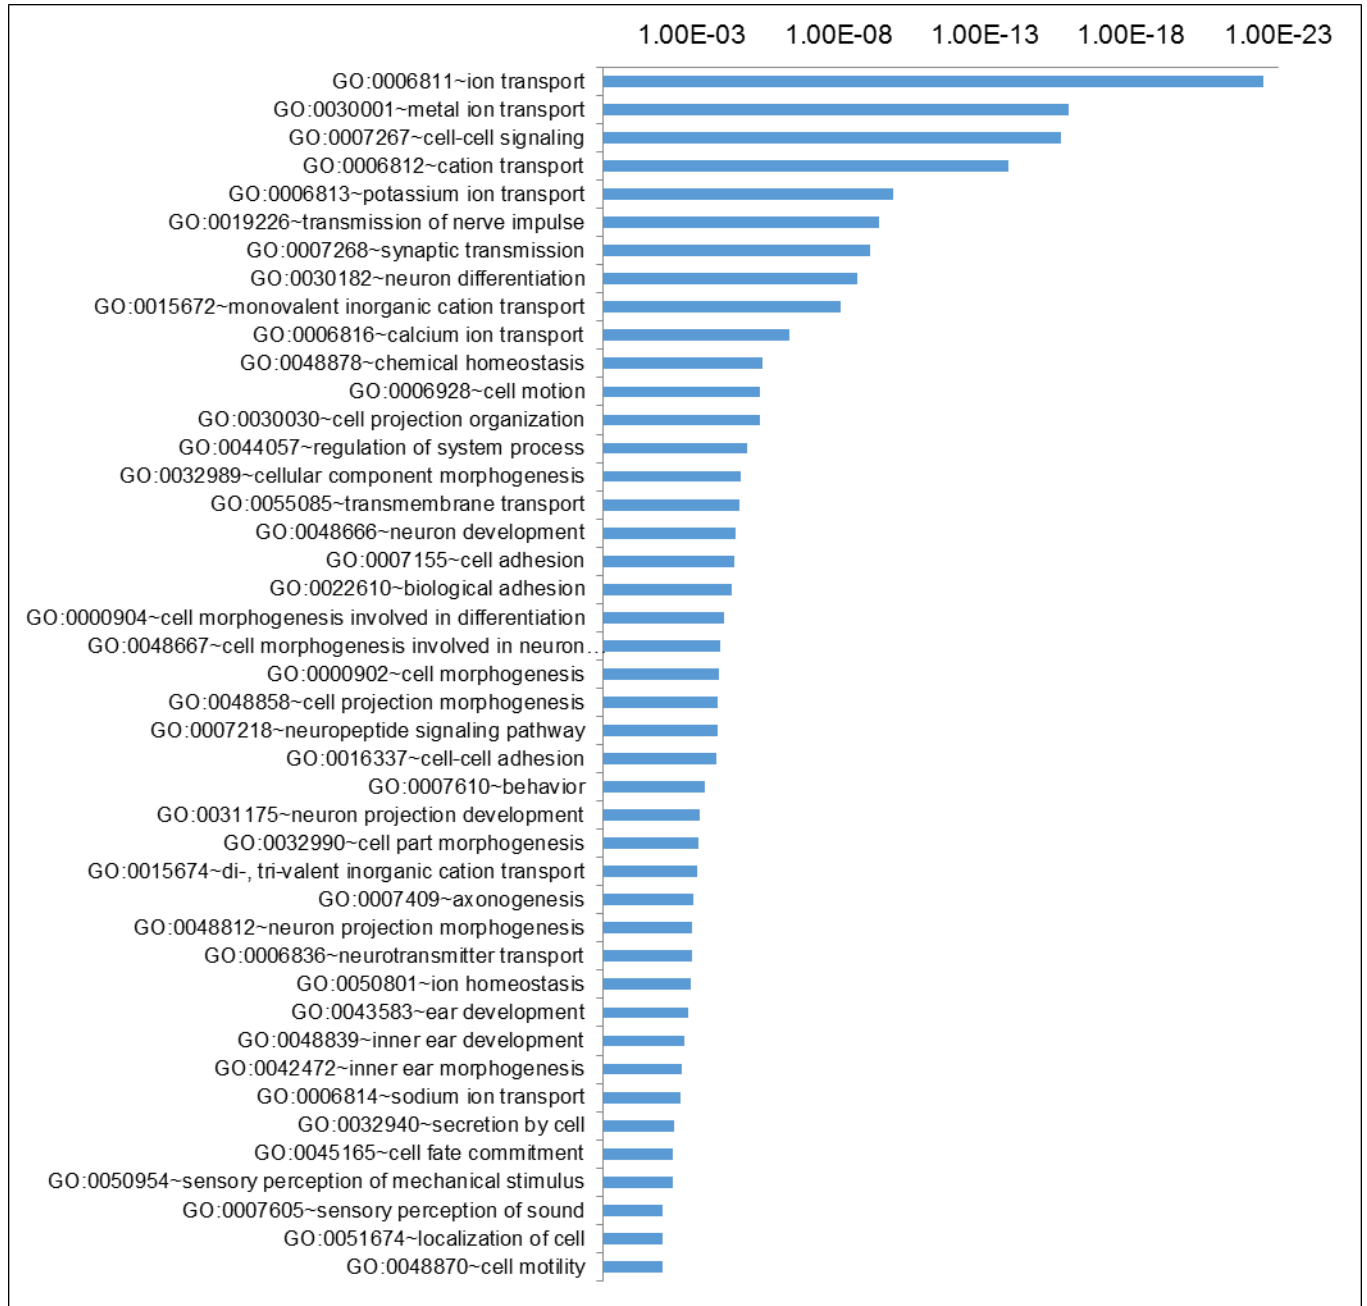

Figure S5B

B. Human iPSCs

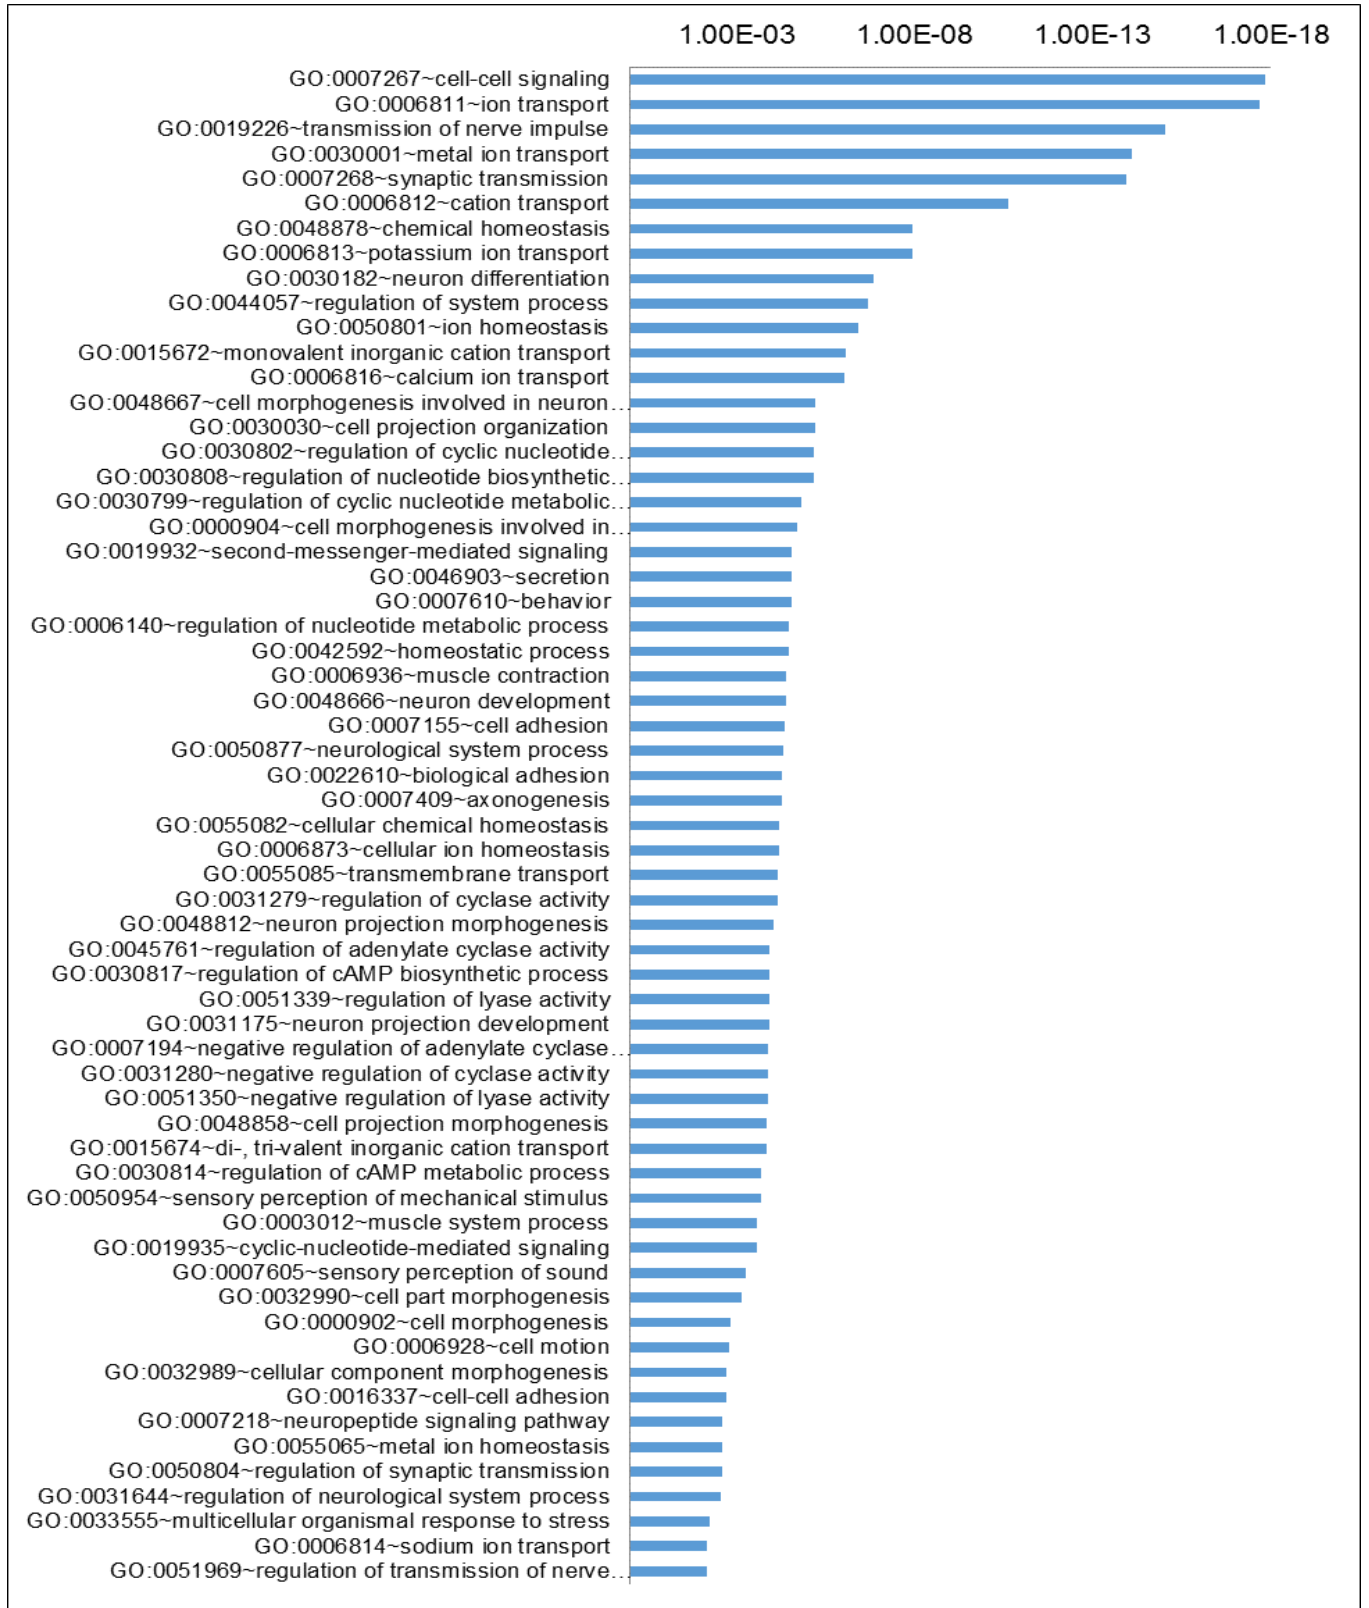

Figure S5C

C. Mouse iPSCs

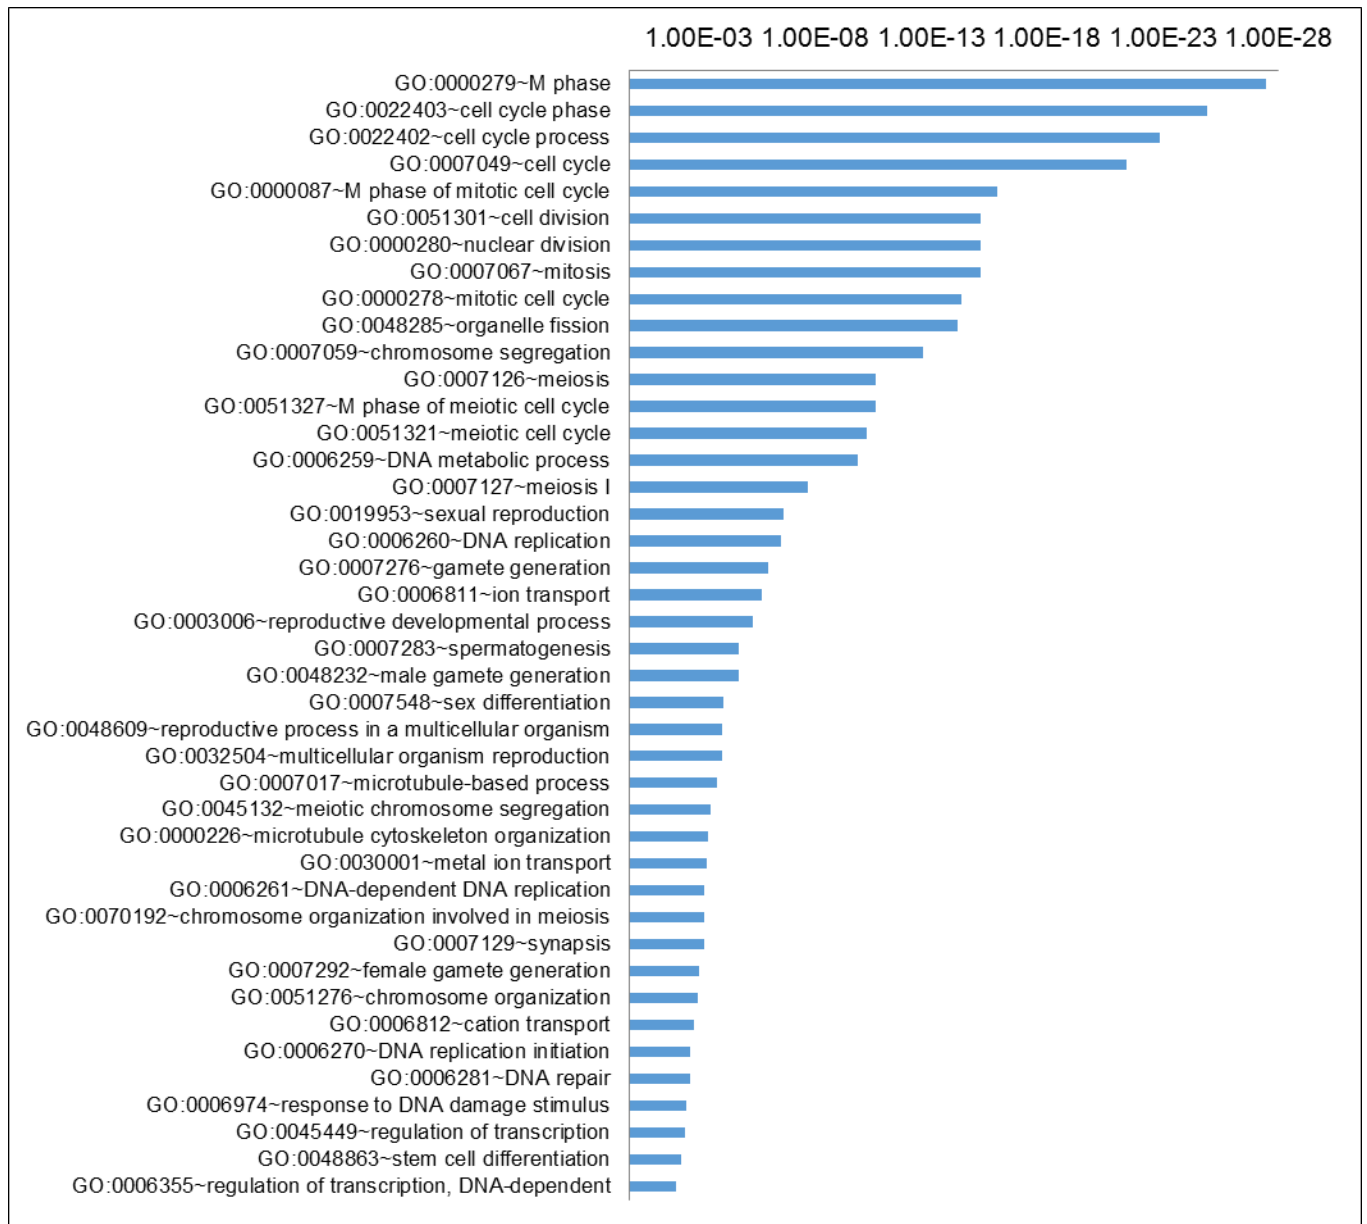

## SUPPLEMENTAL FIGURE LEGENDS

### Figure S1. Conventional iPSC conditions do not favor NMR cell reprogramming. Related to Figure 1.

(A) Real-time PCR analyses of endogenous *Ecad*, *Esrrb*, *Utf1* and *Sox2* expression in NMR cells expressing mouse or human OSKM. All values are mean  $\pm$  SEM from three independent experiments. (B) Real-time PCR analyses of endogenous *Ecad*, *Esrrb*, *Utf1* and *Sox2* expression in NMR cells subjected to mouse OSKM in combination with cytokines. All values are mean  $\pm$  SEM from three independent experiments. Relative expression was normalized to the expression of *Gapdh*. (C) Generation of mouse iPSCs from embryonic fibroblasts. Mouse fibroblasts, morphology of iPSC cells and AP staining, respectively. Scale bars, 100  $\mu$ m. (D) Representative images of mouse iPSC colonies following immunostaining for OCT4, SOX2 and NANOG. Scale bars, 100  $\mu$ m. (E) No changes in morphology of NMR cells were detected during the 24-day procedure. Scale bars, 100  $\mu$ m. (F) Immunocytochemical analyses of OCT4 in NMR cells at day 24. Scale bars, 100  $\mu$ m.

### Figure S2. Generation and maintenance of naked mole rat iPSCs. Related to Figure 1.

(A) AP-positive colonies derived from NMR embryonic fibroblasts with combination with cytokines. Values represent means  $\pm$  standard deviations for three independent experiments. \* $<0.05$ , \*\* $p<0.001$ . (B) AP staining under feeder or feeder-free (Matrigel) conditions (upper panel). Number of AP-positive colonies are shown in the lower panel. Values represent means  $\pm$  standard deviations for three independent experiments. (C) Role of vitamin C (VC) in generation of iPSCs from immortalized or primary embryonic fibroblasts. AP staining in the presence of vitamin C is shown in the left panel, and the numbers of AP-positive colonies in the right. Values represent means  $\pm$  standard deviations for three independent experiments. (D) AP-staining and OCT4 immunocytochemical analyses of iPSCs generated under N2B27+2i and N2B27+3i conditions. Scale bars, 100  $\mu$ m. (E) Representative images of NMR skin (left panel) and testis (right panel) fibroblasts. Representative images of NMR skin and testis iPSC colonies (lower panel) from skin and testis fibroblasts following immunostaining for OCT4, SOX2 and SSEA-1. Scale bars, 100  $\mu$ m. (F) Real-time PCR analysis of transgene (*Oct-4 tg* and *c-Myc tg*) expression in NMR iPSCs following removal of doxycycline(dox). dox+: culture with dox, dox-: culture without dox, p10: passage 10. All values are mean  $\pm$  SEM from three independent experiments. Relative expression was normalized to the expression of *Gapdh*.

### Figure S3. Effect elevated temperature on culture and differentiation of NMR iPSCs.

(A) Number of viable iPSCs at normal (32°C) and elevated (37°C) temperature. NMR iPSCs were cultured at 32°C or 37°C for 20 days. Viable cells were detected by trypan blue staining. All values are mean  $\pm$  SEM from three independent experiments. Asterisk indicates  $P=0.05$  by t-test. (B) Number of viable cells during differentiation. NMR iPSCs cultured at 32°C or 37°C without pluripotent environment. Viable cells were detected by trypan blue staining. All values are mean  $\pm$  SEM from three independent experiments. (C) Morphology of EBs at indicated temperature. NMR iPSCs were grown as a suspension culture on low adherent plates using normal medium for one week. The same number of cells used for EB formation. The experiment was repeated 3 times, with similar morphology. Scale bars, 100  $\mu$ m. (D) Number of EBs at indicated temperature. EBs were counted following one week in culture. The same number of cells were used for EB formation. All values are mean  $\pm$  SEM from three independent experiments. (E) *In vitro* differentiation of NMR iPSCs at 37°C. Immunocytochemical analyses of EB expression: pluripotency marker (OCT4; negative control), endoderm (AFP and GATA4), mesoderm (alpha-actinin) and ectoderm (TUJ-1 and GFAP) markers.



**Figure S4. Interspecific chimera. Related to Figure 4.**

(A) Morphology of the generated EGFP-expressing NMR iPSCs. Scale bars, 100  $\mu\text{m}$ . (B) Representative images of EGFP-expressing NMR iPSC colonies after immunostaining for OCT4, SOX2 and SSEA-1. Scale bars, 100  $\mu\text{m}$ . (C) Mouse blastocyst stage embryos soon after injection of EGFP-expressing NMR iPSCs. Injected iPSCs lie in the subzonal space. Scale bars, 100  $\mu\text{m}$ . (D) NMR contribution to the embryos (E13.5). Genomic PCR analyses of mouse embryos derived from blastocyst injection of NMR iPSC. NMR-specific primers were used for the detection of chimeric contribution from NMR iPSCs. Number: fetus ID; 1-2,3: No 2 and 3 abnormal embryo from #1 surrogate mother. etc.; T: kidney capsules of mice transplanted with NMR iPSCs; WT: wild type fetus. Confirmed chimera are labeled in red, and non-chimeric fetuses in black. (E) Aborted fetus was analyzed 11 days after embryo transfer into uteri of 2.5 dpc pseudopregnant mice (E13.5). Representative images show integration of NMR iPSCs into different locations in the aborted fetus body after whole-mount immunostaining with anti-GFP antibodies and confocal analysis. Controls are the samples treated only with secondary antibodies. Scale bars, 100  $\mu\text{m}$ . (E) Representative images showing integration of NMR iPSCs into different locations in the placenta and fetus following whole-mount immunostaining with anti-GFP antibodies and confocal analysis. Controls show samples treated only with secondary antibodies. Scale bars, 100  $\mu\text{m}$ .

**Figure S5. GO analysis of mouse, NMR and human iPSCs. Related to Figure 5.**

(A) GO analysis of differentially expressed genes (FDR<0.05) in NMR iPSCs compared to NMR fibroblasts. (B) GO analysis of differentially expressed genes (FDR<0.05) in human iPSCs compared to human fibroblasts. (C) GO analysis of differentially expressed genes (FDR<0.05) in mouse iPSCs compared to mouse fibroblasts.

## SUPPLEMENTAL TABLES

**Table S1. Information of NMR fibroblasts and iPSCs to using this study.**

### NMR Fibroblasts

| No. | Cell line | Origin                          | SV40 large T | Sex    | Karyotyping          | No. of iPSCs Clones |
|-----|-----------|---------------------------------|--------------|--------|----------------------|---------------------|
| 1   | ef1       | Embryonic fibroblasts           | O            | female | diploid + tetraploid | 11                  |
| 2   | ef2       | Embryonic fibroblasts           | O            | Male   | diploid              | 19                  |
| 3   | ef5       | Embryonic fibroblasts           | O            | female | diploid + tetraploid | 14                  |
| 4   | eLung     | Embryonic fibroblasts from lung | x            | Male   | diploid + tetraploid | 13                  |
| 5   | ef5N      | Embryonic fibroblasts           | x            | female | diploid + tetraploid | 5                   |
| 6   | K1        | Adult fibroblasts from kidney   | x            | Male   | diploid              | 8                   |
| 7   | K2        | Adult fibroblasts from kidney   | x            | Male   | diploid              | 3                   |
| 8   | Skin      | Adult fibroblasts from skin     | x            | Male   | n.a                  | 3                   |
| 9   | Testis    | Adult fibroblasts from testis   | x            | Male   | n.a                  | 3                   |

n.a = not applicable

### NMR iPSCs

| No. | Cell line | Origin | Pluripotency Test      | Differentiation Test    | Karyotyping | Teratoma assay | RNA-seq |
|-----|-----------|--------|------------------------|-------------------------|-------------|----------------|---------|
| 1   | 1-4       | ef1    | AP, ICA                | EB                      | tetraploid  | n.a            | n.a     |
| 2   | 1-5       | ef1    | AP, ICA, i-1 (RT-PCR), | EB, ICA, EBi-1 (RT PCR) | tetraploid  | n.a            | O       |
| 3   | 2-6       | ef2    | AP, ICA                | EB                      | tetraploid  | n.a            | n.a     |
| 4   | 2-8       | ef2    | AP, ICA, i-2 (RT-PCR), | EB, ICA, EBi-2 (RT PCR) | diploid     | O              | n.a     |
| 5   | 5-2       | ef5    | AP, ICA                | EB                      | tetraploid  | O              | n.a     |
| 6   | 5-7       | ef5    | AP, ICA                | EB                      | tetraploid  | n.a            | O       |
| 7   | L-2       | eLung  | AP, ICA, e-1 (RT PCR)  | EB, ICA, EBe-1 (RT PCR) | tetraploid  | O              | O       |
| 8   | L-4       | eLung  | AP, ICA                | EB                      | tetraploid  | n.a            | n.a     |
| 9   | 5-CN      | ef5N   | AP, ICA, e-2 (RT PCR)  | EB, ICA, EBe-2 (RT PCR) | tetraploid  | O              | O       |
| 10  | K1-6      | K1     | AP, ICA                | EB                      | tetraploid  | n.a            | n.a     |
| 11  | K1-8      | K1     | AP, ICA, a-1 (RT PCR)  | EB, ICA, EBa-1 (RT PCR) | tetraploid  | O              | O       |
| 12  | K2-1      | K2     | AP, ICA, a-2 (RT PCR)  | EB, ICA, EBa-2 (RT PCR) | tetraploid  | O              | O       |
| 13  | K2-2      | K2     | AP, ICA                | EB                      | tetraploid  | n.a            | n.a     |
| 14  | SK1-1     | Skin   | AP, ICA                | EB, ICA                 | tetraploid  | n.a            | n.a     |
| 15  | Testis1-1 | Testis | AP, ICA                | EB, ICA                 | tetraploid  | n.a            | n.a     |

AP = Alkaline phosphatase positive

ICA = Immunocytochemical analysis (Oct4, Sox2 and SSEA1)

EB = Embryobody formation

n.a = not applicable

**Table S2. Primer sequences. Related to experimental procedures**

| Gene name                   | Forward (F) or reverse (R) | 5'-3'                      | Used                                                                             |
|-----------------------------|----------------------------|----------------------------|----------------------------------------------------------------------------------|
| <i>Snail</i>                | F                          | CCAACCTACGTGCTCACCTG       | qRT-PCR for <i>Snail</i> : reprogramming                                         |
|                             | R                          | ACTCTTGGTGTTTGTGGAGCA      |                                                                                  |
| <i>Tgfb1</i>                | F                          | CGCTTCTGCTACCGCTACTG       | qRT-PCR for <i>Tgfb1</i> : reprogramming                                         |
|                             | R                          | GCGAGCCGTAATTTGGACAG       |                                                                                  |
| <i>Ecad</i><br>(E-cadherin) | F                          | GGTGCTCTCCAGGAACCTC        | qRT-PCR for <i>Ecad</i> : reprogramming                                          |
|                             | R                          | TGGCTGTGAGGCAATGTAGG       |                                                                                  |
| <i>Esrrb</i>                | F                          | AAGCACATCCCAGGCTTCTC       | qRT-PCR for <i>Esrrb</i> : reprogramming                                         |
|                             | R                          | CAGCTTGTATCGTAGGGCA        |                                                                                  |
| <i>Utf1</i>                 | F                          | TCTCGGGAGTCCAGCTACC        | qRT-PCR for <i>Utf1</i> : reprogramming<br>RT-PCR for <i>Utf1</i> : pluripotency |
|                             | R                          | AGCAGCAATTCCGTCTCCC        |                                                                                  |
| <i>Endo-Sox2</i>            | F                          | CATGTCCCAGCACTACCAGG       | qRT-PCR for <i>Sox2</i> : reprogramming<br>RT-PCR for <i>Sox2</i> : pluripotency |
|                             | R                          | TTTCTGCCTCTCCTCGTTCCG      |                                                                                  |
| <i>Gapdh-1</i>              | F                          | AGGTCGGAGTGAACGGATTTG      | qRT-PCR for control : reprogramming                                              |
|                             | R                          | CCGTGGGTGGAGTCATACTG       |                                                                                  |
| <i>Nanog</i>                | F                          | AAGTACCTCAGCCTGCAGCAGATGC  | RT-PCR for <i>Nanog</i> : pluripotency<br>Miyawaki et al (2016)                  |
|                             | R                          | TTTTCTGCCACCGCTTACATTTTCAT |                                                                                  |
| <i>Fgf4</i>                 | F                          | CGTGAGCATCTTTGGAGTGGCCAGC  | RT-PCR for <i>Fgf4</i> : pluripotency<br>Miyawaki et al (2016)                   |
|                             | R                          | CAGCCTGGGGAGAAAGTGGGTGAC   |                                                                                  |
| <i>Zfp42 (Rex-1)</i>        | F                          | CCACGGACATCTCCCCTTAC       | RT-PCR for <i>Zfp42</i> : pluripotency                                           |
|                             | R                          | TGGTAGTTGAATGCGGCTGG       |                                                                                  |
| <i>Tert</i>                 | F                          | CCTGCTCAAGCTGGGTCATCACCGTG | RT-PCR for <i>Tert</i> : pluripotency<br>Miyawaki et al (2016)                   |
|                             | R                          | TCAGTCCAGGATGGTCTTGAAGT    |                                                                                  |
| $\beta$ -Actin              | F                          | ACAACGGCTCCGGCATGTGCAA     | RT-PCR for $\beta$ -Actin : pluripotency<br>Miyawaki et al (2016)                |
|                             | R                          | CATTGTAGAAGGTGTGGTGCCAGA   |                                                                                  |
| <i>Sox17</i>                | F                          | GAAGGTGAAGGGCGAGGT         | RT-PCR for <i>Sox17</i> : differentiation                                        |
|                             | R                          | TGCGCGTAGCTGTAGTTG         |                                                                                  |
| <i>Gata4</i>                | F                          | ACACCCCAACCTAGCAGACA       | RT-PCR for <i>Gata4</i> : differentiation                                        |
|                             | R                          | CTGACGGGAGATGTGTAGCC       |                                                                                  |
| <i>Pdx1</i>                 | F                          | CCACGGACATCTCCCCTTAC       | RT-PCR for <i>Pdx1</i> : differentiation                                         |
|                             | R                          | TGGTAGTTGAATGCGGCTGG       |                                                                                  |
| <i>Acta2</i>                | F                          | GGGATGGAATCTGCTGGCAT       | RT-PCR for <i>Acta2</i> : differentiation                                        |
|                             | R                          | GCGGTGGACAATAGAGGGTC       |                                                                                  |
| <i>Actc1</i>                | F                          | TACCACCGCTGAACGTGAAA       | RT-PCR for <i>Actc1</i> : differentiation                                        |
|                             | R                          | ATTTGCGGTGGACGATGGAT       |                                                                                  |
| <i>Kdr</i>                  | F                          | CTGCACAGCATTTGGGAACC       | RT-PCR for <i>Kdr</i> : differentiation                                          |
|                             | R                          | GTTTCATCCAGGGGCAGTTCA      |                                                                                  |

| Gene name           | Forward (F) or reverse (R) | 5'-3'                                          | Used                                                               |
|---------------------|----------------------------|------------------------------------------------|--------------------------------------------------------------------|
| <i>Sox1</i>         | F<br>R                     | GAAGGAGCACCCGGACTACA<br>GCCCTGTGAGTTGGAGATGGG  | RT-PCR for <i>Sox1</i> : differentiation                           |
| <i>Pax6</i>         | F<br>R                     | GAATTCTGCAGGTGTCCAACGG<br>TCCTCAGCTTCTCCTCTCGT | RT-PCR for <i>Pax6</i> : differentiation                           |
| <i>Nes</i> (Nestin) | F<br>R                     | GGCTACGGACCACTGAAAA<br>CATCCTGGGCTCTGACCTCT    | RT-PCR for <i>Nes</i> : differentiation                            |
| <i>Gapdh-2</i>      | F<br>R                     | AGGTCGGAGTGAACGGATTTG<br>CCGTGGGTGGAGTCATACTG  | RT-PCR for <i>Gapdh</i> : differentiation                          |
| <i>M2rtTA</i>       | F<br>R                     | GTACGCTCTGTCCGCCGTGG<br>CAAGGGCATCGGCTGGGAGC   | Genomic PCR for <i>M2rtTA</i> :<br>Teratoma and chimera genotyping |
| <i>Oct-4 tg</i>     | F<br>R                     | ACATCGCCAATCAGCTTGG<br>AGAACCATACTCGAACCACATCC | qRT-PCR for <i>Oct4</i> : transgene<br>Carey et al (2009)          |
| <i>c-Myc tg</i>     | F<br>R                     | GGCTGGAGATGTTGAGAGCAA<br>AAAGGAAATCCAGTGGCGC   | qRT-PCR for <i>c-Myc</i> : transgene<br>Carey et al (2009)         |



## SUPPLEMENTAL EXPERIMENTAL PROCEDURES

### Lentiviral and retroviral production and infection

To produce infectious lentiviral particles, HEK293T cells cultured on 10 cm dishes were transfected with the vectors 4F2A (mouse OSKM: tetO-FUW-OSKM; human OSKM: FUW-tetO-hOCT4, FUW-tetO-hSOX2, FUW-tetO-hKlf4, FUW-tetO-hMYC) and M2rtTA (Addgene plasmids #20321, #20726, #20724, #20723, #20725 and # 20342, respectively) together or pWPI (EGFP; Addgene plasmid # 12254) with packaging plasmids VSV-G and 8.91 (gag/pol). These plasmids were introduced into HEK293 LTV cells using the calcium phosphate precipitation method. Medium was replaced 12 h following transfection, and after an additional 48 and 72 h, supernatants containing viral particles were harvested and filtered through a 0.45  $\mu$ m cellulose acetate filter. EGFP alone or equal volumes of mOSKM or hOSKM and M2rtTA lentiviral supernatants were mixed, supplemented with polybrene at the final concentration of 6  $\mu$ g/ml and directly used for transduction of mouse and NMR fibroblasts. To establish immortalized embryonic fibroblasts, retrovirus was produced using plasmids derived from pBabe-puro vector in combination with the standard GAG-Pol and VSV-G vectors. The diluted viral medium was overlaid onto early stage (passage <3) of NMR primary fibroblasts and infected cells were enriched by selection with puromycin.

### Establishment and maintenance of mouse and NMR iPSCs

ES-like colonies were observed and picked after culturing cells in N2/B27 2i medium both in feeder and feeder-free conditions. Isolated colonies were digested in 0.05% trypsin and passaged on gelatin-coated 6-well plates onto MEF feeder cells. NMR iPSCs were maintained in N2/B27 + mLIF 2i or 3i (additional 0.5  $\mu$ M inhibitor ALK5; A83-01) media and were routinely subcultured every 6-7 days. In mouse, iPSC colonies were picked on day 10, dissociated by 0.05% trypsin digestion, and plated into new 6-well dishes onto mytomycin C inactivated or irradiated MEF feeder cells. Mouse iPSCs were subcultured every 2–3 days and were maintained in ESC culture medium in the presence of 1000 U/ml mLIF. Doxycycline was removed from the culture medium after passage 5. NMR iPSCs using in this study are listed in Table S1.

### *In vitro* differentiation and immunofluorescence

Colonies growing on MEFs were detached using 0.05% trypsin and grown as a suspension culture on low adherent plates using ESC medium without dox and LIF. After 1 week of suspension growth, cells were transferred to 12- or 24-well plates coated with 0.1% gelatin and grown in DMEM supplemented with 20% FBS. EBs were grown for 1–2 weeks prior to fixation and immunofluorescence staining. Cultures were fixed and stained as described above using the following antibodies: AFP (1:200, Santa Cruz Biotech; sc-8108), GATA4 (1:200, Santa Cruz Biotech; sc-1237), OCT4 (1:200, Santa Cruz Biotech; sc-5279),  $\alpha$ -ACTININ (1:200, Sigma; A7732), GFAP (1:500, Dako; Z0334), and TUJ-1 (1:500, Covance; MMS-435P).

### Flow Cytometry

Flow cytometry for DNA content was performed by fixing cells in ethanol and staining with propidium iodide (PI). Cells were analyzed on the 585/42 channel with a BD Accuri C6 Analyzer (BD Biosciences).
